# Supplementary material for: Accurate recapture identification for genetic mark–recapture studies with error-tolerant likelihood-based match calling and sample clustering
Source: PubMed Central journal article supplement (PMC5210676; doi:10.1098/rsos.160457), 2016-12-21
Supplement: rsos160457supp1.pdf [file rsos160457supp1.pdf]

Accurate recapture identification for genetic mark-recapture studies with error-tolerant likelihood-based match calling and sample clustering.

Supplementary Materials

Suresh A. Sethi\*, Daniel Linden, John Wenburg, Cara Lewis, Patrick Lemons, Angela Fuller, Matthew P. Hare

\*e.: suresh.sethi@cornell.edu

Contents:

Supplement 1: Detail of the error-tolerant likelihood-based match calling and sample clustering approach

Supplement 2: R script to implement the error-tolerant likelihood-based match calling model and sample clustering algorithms: MSATs

Supplement 3: R script to implement the error-tolerant likelihood-based match calling model and sample clustering algorithms : SNPs

Supplement 4: Case study genetic marker characteristics

Supplement 5: Detailed base case simulation results

### **Supplement 1: Detail of the error-tolerant likelihood-based match calling and sample clustering approach**

Following methods developed by Wang (2004, 2006, 2016) and Kalinowski et al. (2006), the error-tolerant likelihood-based match calling and sample clustering approach contains four components: 1) a model for observed genotypes which accommodates genotyping error, 2) a model to describe the probability of obtaining a pair of true “latent” genotypes, 3) a likelihood model to evaluate the evidence to call a match between a pair of observed genotypes, and 4) a sample clustering algorithm to group genotypes into same-individual sets, i.e. recapture events. We utilized the genotyping error model for microsatellite (MSAT) genotypes from Wang (2004,2006,2016) and propose a separate genotyping error model for single nucleotide polymorphism (SNP) genotypes. Statements to inform the joint probability of observing a pair of latent genotypes needed to implement the likelihood-based match calling model proposed analogously by Kalinowski et al. (2006) and Wang (2016) were taken from Weir et al. (2006). The formulation of the likelihood for an observed pair of genotypes coming from a given relationship state (e.g. “same individual”, indicating a recapture event) follows that analogously proposed by Kalinowski et al. (2006) and Wang (2016), however, we utilize likelihood ratios to make match calls, as presented in Kalinowski et al. (2006). Finally, we propose a novel two-stage sample clustering approach. Table S1.1 provides notation definitions.

The assumptions of the error-tolerant likelihood-based match calling model (LM) as implemented here are as follows:

- A1. The sample population is non-inbred and mating is random.
- A2. Genotypes are diploid with codominant alleles.
- A3. Loci are independent (non-linked).
- A4. Estimates of allele frequencies are unbiased.
- A5. The genotyping error process proposed during probability calculations matches that from the genotyping error data generating process for sample genotypes
- A6. Estimates of genotyping error rates are unbiased.

Assumptions A1-A2 are necessary for the specification of probabilities of experiencing a pair of multilocus genotypes given a relationship state and population allele frequencies. Statements for inbred populations are also available (e.g. Weir et al. 2006). With Assumption A3, joint probabilities of observed multilocus genotypes can be computed by multiplying across loci. Assumptions 4-6 are necessary to ensure the specified probability models are consistent with the multilocus genotype data generating process, although the LM approach demonstrates some robustness to deviations from these assumptions (see the Main Text).

Describing the four components to the LM and sample clustering approach in detail, first, a model for the probability of observing a sampled genotype at locus  $j$  for individual  $i$ ,  $g_{ij}$ , given a proposed latent genotype,  $k_{ij}$ ,  $P(g_{ij}|k_{ij})$  is specified. In the present implementation, we specified a two-class genotyping error model for MSAT markers following Wang (2004, 2006, 2016) and comprising of an allelic dropout rate,  $\rho_{j,1}$ , and a false allele (mistyping) error rate,  $\rho_{j,2}$ , where error rates are *per allele*. Under Wang's genotyping error model, allelic dropout events occur before false allele events, and either allele in a diploid genotype is equally probable to dropout. Subsequent to allelic dropout, 0, 1, or 2 false allele (i.e. mistyping) events can occur. For  $a_j$  alleles at locus  $j$ , when a false allele mistype occurs, it is assumed that all alleles have equal probability of being called. For notational convenience (sensu Wang 2004, 2006, 2016), define  $r_{j,1} = \rho_{j,1}/(1 + \rho_{j,1})$  and  $r_{j,2} = \rho_{j,2}/(a_j - 1)$ .

Note, the allelic dropout rate is relevant to latent heterozygotes only, such that empirical allelic dropout rates should be estimated based upon attempts to genotype heterozygotes; false allele events apply to both latent heterozygotes and homozygotes and thus false allele error rates should be estimated based upon the total number of genotypes attempted for error rate estimation (see Broquet and Petit 2004). Dropping for the moment individual and locus subscripts, let  $g_{\{u,v\}}$  indicate an observed genotype with alleles  $u$  and  $v$ , and let  $k_{\{w,x\}}$  indicate a latent genotype with alleles  $w$  and  $x$ . From Wang (e.g. 2016), combining allelic dropout and false allele events, then for latent heterozygote genotypes ( $w \neq x$ ):

$$P(g_{\{u,v\}}|k_{\{w,x\}}) = \begin{cases} (1 - \rho_2)^2 + r_2^2 - 2r_1(1 - r_2 - \rho_2)^2 & u = w, v = x & \text{No errors} \\ r_2(1 - \rho_2) + r_1(1 - \rho_2 - r_2)^2 & u = v = w, \text{ or } u = v = x & \text{Apparent allelic dropout} \\ r_2^2 & \text{for } u \neq w, u \neq x, v \neq w, v \neq x \text{ with } u = v & \text{i. e. 2 mistypes, same allele} \\ 2r_2^2 & u \neq w, u \neq x, v \neq w, v \neq x \text{ with } u \neq v & \text{2 mistypes, different alleles} \\ r_2(1 - \rho_2 - r_2) & \text{otherwise} & \text{1 mistype} \end{cases}$$

and for latent homozygous genotypes ( $w = x$ ):

$$P(g_{\{u,v\}}|k_{\{w,x\}}) = \begin{cases} (1 - \rho_2)^2 & u = v = w = x & \text{No errors} \\ 2r_2(1 - \rho_2) & \text{for } u = w, v \neq w \text{ or } v = w, u \neq w & \text{1 mistype} \\ r_2^2 & u \neq w, v \neq w \text{ with } u = v & \text{i. e. 2 mistypes, same allele} \\ 2r_2^2 & u \neq w, v \neq w \text{ with } u \neq v & \text{2 mistypes, different alleles} \end{cases}$$

Note, in some cases probability statements account for multiple pathways between latent genotypes and observed genotype outcomes; for example, what appears to be an allelic dropout event could occur because one allele from a latent heterozygote genotypes drops out during genotyping, or from a mistype event where the mis-called allele happens by chance to mirror the other allele copy (among other pathways).

For SNP markers, we assume loci are bi-allelic, whereby we implement a simple generic genotyping error model to reflect that a given allele is either called correctly as the latent allele or incorrectly as the opposite allele. Dropping locus and individual subscripts, let  $d_{gk}$  be the total number of alleles discrepant between observed genotype  $g$  and latent genotype  $k$ . The probability of observing  $g$  given a proposed  $k$  is,

$$P(g|k) = \gamma^{d_{gk}}(1 - \gamma)^{2-d_{gk}},$$

where  $\gamma$  is the *per allele* genotyping error rate. Under this error model for biallelic SNPs, when an error occurs the latent allele is switched for the other existing allele at the locus. A total of 0 (e.g.  $(g, k) = (AB, AB)$ ), 1 (e.g.  $(g, k) = (AB, BB)$ ), or 2 (e.g.  $(g, k) = (AA, BB)$ ) miss-called alleles can occur at a locus, i.e.  $d_{gk} \in \{0, 1, 2\}$ .

Second, a model is proposed for the probability of observing an unordered pair of latent diploid genotypes,  $P(k_1, k_2|R)$ , given a proposed relationship state,  $R$  (e.g.  $R \in \{SI, U, FS, PO\}$ ;  $SI$  = a pair of samples from the same individual,  $U$  = samples from unrelated individuals,  $FS$  = samples from a pair of full siblings, and  $PO$  = samples from a parent offspring pair; other relationships could also be assessed if desired), and set of allele frequencies  $\mathbf{p}_j = \{p_{j,1}, \dots, p_{j,a_j}\}$ . Let  $u, v, w$ , and  $x$  denote four alleles. Dropping subscripts for individuals and loci and utilizing equations provided in Weir et al. (2006) for non-inbred populations, joint probabilities of experiencing a pair of latent genotypes in the population are:

$$P(k_1, k_2|R) = \begin{cases} y_2 p_u^2 + y_1 p_u^3 + y_0 p_u^4 & uu, uu & 2 \text{ hom.}, 2 \text{ shared alleles} \\ y_0 p_u^2 p_v^2 & uu, vv & 2 \text{ hom.}, 0 \text{ shared alleles} \\ y_1 p_u^2 p_v + 2y_0 p_u^3 p_v & uu, uv & 1 \text{ hom.}, 1 \text{ het.}, 1 \text{ shared allele} \\ 2y_0 p_u^2 p_w p_x & uu, wx & \text{i.e. } 1 \text{ hom.}, 1 \text{ het.}, 0 \text{ shared allele} \\ 2y_2 p_u p_v + y_1 p_u p_v (p_u + p_v) + 4y_0 p_u^2 p_v^2 & uv, uv & 2 \text{ het.}, 2 \text{ shared alleles} \\ y_1 p_u p_v p_x + 4y_0 p_u^2 p_v p_x & uv, ux & 2 \text{ het.}, 1 \text{ shared alleles} \\ 4y_0 p_u p_v p_w p_x & uv, wx & 2 \text{ het.}, 0 \text{ shared alleles} \end{cases}$$

where probabilities of 0, 1, or 2 alleles identical by descent,  $y_0, y_1$ , and  $y_2$ , respectively, given a relationship state are defined as:

$$y_2 = \begin{cases} 1 \\ 0 \\ 0.25 \\ 0 \end{cases} \text{ for } R = \begin{matrix} SI \\ U \\ FS \\ PO \end{matrix}, y_1 = \begin{cases} 0 \\ 0 \\ 0.5 \\ 1 \end{cases} \text{ for } R = \begin{matrix} SI \\ U \\ FS \\ PO \end{matrix}, \text{ and } y_0 = \begin{cases} 0 \\ 1 \\ 0.25 \\ 0 \end{cases} \text{ for } R = \begin{matrix} SI \\ U \\ FS \\ PO \end{matrix}.$$

Note, depending on the number of alleles at a locus, not all latent genotype pair outcomes are possible. For example, for biallelic SNPs, there are only 4 possible outcomes for (unordered) pairs of latent diploid genotypes:  $\{uu, uu\}$ ,  $\{uu, vv\}$ ,  $\{uu, uv\}$ , and  $\{uv, uv\}$ .

Third, the likelihood of a hypothesized relationship state between a pair of sample multilocus genotypes,  $R_{(1,2)}$ , which incorporates information on population allele frequencies as well as genotyping error is calculated as:

$$L(R_{(1,2)}) = \prod_j \left[ \sum_{k_{j,1}}^{A_j} \sum_{k_{j,2}}^{A_j} P(k_{j,1}, k_{j,2} | R_{(1,2)}) P(g_{j,1} | k_{j,1}) P(g_{j,2} | k_{j,2}) \right],$$

where indexing for summations indicate that sums are taken across the set of all possible latent diploid genotypes at locus  $j$ ,  $A_j$ . The strength of evidence for the  $SI$  relationship state, i.e. a match call, is assessed by calculating the ratio of likelihood of a  $SI$  relationship to the maximum likelihood alternative relationship hypothesis:

$$\Lambda = L(R_{(1,2)} = SI) / \max\{L(R_{(1,2)} = U), L(R_{(1,2)} = FS), L(R_{(1,2)} = PO)\}.$$

If  $\Lambda > 1.0$ , then a match call is made, else the samples are inferred to have come from separate individuals. The framework developed by Kalinowski et al. (2006) allows for multiple captures to be grouped within a single sample cluster in assessing match calls, for instance as multilocus genotypes would reflect if a single individual is repeatedly sampled three or more times within a sampling occasion. In such cases the above likelihood model is expanded to consider pairwise comparisons of sets of multilocus genotypes,  $G_1$  and  $G_2$ , as opposed to pairwise comparison of single multilocus genotypes. In this case,  $L(R_{(G_1, G_2)})$  is defined as:

$$L(R_{(G_1, G_2)}) = \prod_j \left[ \sum_{k_{j,1}}^{A_j} \sum_{k_{j,2}}^{A_j} P(k_{j,1}, k_{j,2} | R_{(G_1, G_2)}) P(G_{j,1} | k_{j,1}) P(G_{j,2} | k_{j,2}) \right]$$

where  $P(G_{j,1} | k_{j,1}) = \prod_{g_j \in G_{j,1}} P(g_j | k_{j,1})$  indicates that probabilities of observed genotypes in a set given a latent genotype are the product across  $P(g_j | k_{j,1})$  for all genotypes in set  $G_1$  at locus  $j$ . Subsequently, the likelihood ratio to evaluate the strength of evidence for the  $SI$  relationship state is calculated as above.

Finally, a sample clustering algorithm is implemented to group multilocus genotypes into singleton sets indicating unique individuals and sets of recaptures. We implement a two-stage sample clustering approach to identify recapture events with the error-tolerant likelihood-based match calling model for genetic mark-recapture studies. In stage one, a clustering algorithm is implemented to identify repeated captures within a single sampling occasion. Given a list of size  $n_1$  genotype sets from a sampling occasion,  $S_1 = (G_1, \dots, G_{n_1})$  ordered with an indexing sequence of  $z = (1, \dots, n_1)$ :

Step 1: Define  $S = S_1$  with each sample in  $S_1$  as a singleton set.

Step 2: Compare the first genotype set in the list,  $G_1$  against all other genotype sets in  $S$ ,  $G_z$  for  $z > 1$ , and combine sets into  $G_1$  as a match when  $\Lambda > 1.0$ .

Step 3: Compare the next genotype in sequence, e.g.  $G_2$ , against all other remaining sets in  $S$ ,  $G_z$  for  $z > 2$ , combining sets as a match when  $\Lambda > 1.0$ , and repeat until the last genotype set in sequence is reached, generating an updated set of genotypes,  $\tilde{S} = (\tilde{G}_1, \dots, \tilde{G}_{\tilde{n}_1})$ , where  $\tilde{n}_1 \leq n_1$ .

Step 4: Repeat Steps 2-3 with  $S = \tilde{S}$ ; if no set memberships change, stop, else repeat this step.

After completion of this algorithm, sets within  $\tilde{S}$  with 2 or more genotypes indicate repeated captures within a sampling occasion and can be condensed into a single unique multilocus genotype (possibly reconstructing consensus genotypes from repeated captures of the same individual). Stage one clustering would be implemented for each sampling occasion in the mark-recapture study. Subsequently, a second stage algorithm is implemented to identify recaptures across sampling occasions' lists of unique individuals,  $\tilde{S}_1 = (G_{1,1}, \dots, G_{1,\tilde{n}_1})$  and  $\tilde{S}_2 = (G_{2,1}, \dots, G_{2,\tilde{n}_2})$ :

Step 1: Compare the first genotype set in sequence in  $\tilde{S}_1$  against all genotype sets in  $\tilde{S}_2$  and combine sets as a match when  $\Lambda > 1.0$ . Sets from  $\tilde{S}_2$  which are combined into a given set in  $\tilde{S}_1$  are removed from  $\tilde{S}_2$ .

Step 2: Compare the next genotype in sequence in  $\tilde{S}_1$  against all remaining sets in  $\tilde{S}_2$  combining sets as a match when  $\Lambda > 1.0$  as in Step 1, and repeat until the last genotype set in sequence in  $\tilde{S}_1$  is compared against all remaining sets in  $\tilde{S}_2$  generating updated sets of genotypes,  $S_1^*$  and  $S_2^*$ .

After this second stage clustering, sets in  $S_1^*$  with two genotypes indicate recapture events; singleton sets in  $S_1^*$  and  $S_2^*$  represent unique individuals not recaptured across the pair of compared sampling occasions. Note, this version of the clustering algorithm assumes the starting sample sets  $\tilde{S}_1$  and  $\tilde{S}_2$  are made up solely of unique individuals. In this case, any given individual can only be recaptured once across a pair of compared sampling occasions' lists of unique genotypes and only a single iteration of the algorithm is necessary. Stage two clustering would be implemented for each pairwise comparison of sampling occasions within the mark recapture study and results ultimately translated to individual capture histories.

#### References:

- Broquet T, Petit E. 2004 Quantifying genotyping errors in noninvasive population genetics. *Molecular Ecology* **13**, 3601-3608.
- Kalinowski ST, Taper ML, Creel S. 2006 Using DNA from non-invasive samples to identify individuals and census populations: an evidential approach tolerant of genotyping errors. *Conservation Genetics* **7**, 319-329.
- Wang J. 2004 Sibship reconstruction from genetic data with typing errors. *Genetics* **166**, 1963-1979.
- Wang J. 2006 Informativeness of genetic markers for pairwise relationship and relatedness inference. *Theoretical Population Biology* **70**, 300-321.
- Wang J. 2016 Individual identification from genetic marker data: developments and accuracy comparisons of methods. *Molecular Ecology Resources* **16**, 163-175.
- Weir B, Anderson AD, Hepler AB. 2006 Genetic relatedness analysis: modern data and new challenges. *Nature Reviews Genetics* **7**, 771-780.

Table S1.1 Notation for the error tolerant likelihood-based clustering sample matching approach<sup>a</sup>.

| Notation                     | Definition                                                                                                                                                                                   |
|------------------------------|----------------------------------------------------------------------------------------------------------------------------------------------------------------------------------------------|
| $g_{ij}$                     | An observed diploid genotype for individual $i$ at locus $j$ .                                                                                                                               |
| $k_{ij}$                     | A latent diploid genotype for individual $i$ at locus $j$ .                                                                                                                                  |
| $\rho_{j,1}$                 | Per allele rate of allelic dropout errors (Class I error rate; Wang 2004, 2016) for the MSAT genotyping error model.                                                                         |
| $\rho_{j,2}$                 | Per allele rate of false allele errors (Class II error rate; Wang 2004, 2016) at locus $j$ for the MSAT genotyping error model.                                                              |
| $r_{j,1}$                    | Placeholder variable for the MSAT genotyping error model, equal to $\frac{\rho_{j,1}}{(1 + \rho_{j,1})}$                                                                                     |
| $a_j$                        | Number of alleles at locus $j$ .                                                                                                                                                             |
| $r_{j,2}$                    | Placeholder variable for the MSAT genotyping error model, equal to $\frac{\rho_{j,2}}{(a_j - 1)}$                                                                                            |
| $d_{gk}$                     | Total number of allele discrepancies at a locus between an observed and latent diploid genotype for the SNP genotyping error model.                                                          |
| $\gamma$                     | The per-allele mistyping rate for the SNP genotyping error model.                                                                                                                            |
| $R$                          | A hypothesized relationship state, $R \in \{SI, U, FS, PO\}$ .                                                                                                                               |
| $\mathbf{p}$                 | A vector of $a$ allele frequencies at a locus, $\{p_1, \dots, p_a\}$ .                                                                                                                       |
| $y_0, y_1, \text{ and } y_2$ | Probabilities of experiencing 0, 1, or 2 allele identical by descent at a diploid locus.                                                                                                     |
| $R_{(1,2)}$                  | A relationship state hypothesis when comparing a pair of multilocus genotypes.                                                                                                               |
| $A_j$                        | Set of all possible diploid latent genotypes at locus $j$ .                                                                                                                                  |
| $\Lambda$                    | Maximum likelihood ratio for the strength of evidence of $R_{(1,2)} = SI$ , i.e. a “match” considering alternative hypotheses of $R_{(1,2)} = U$ , $R_{(1,2)} = FS$ , and $R_{(1,2)} = PO$ . |
| $G_1$                        | A set of multilocus genotypes (possibly a singleton set).                                                                                                                                    |
| $R_{(G_1, G_2)}$             | A relationship state hypothesis when comparing a pair of sets of multilocus genotypes                                                                                                        |
| $S, \tilde{S}, S^*$          | Ordered lists of sets of multilocus genotypes; clustering notation. For example, $S_1 = (G_{1,1}, \dots, G_{1,n_1})$ .                                                                       |
| $n_1$                        | Number of samples in set $S_1$                                                                                                                                                               |

<sup>a</sup>Acronyms: MSAT = microsatellite, SNP = single nucleotide polymorphism, SI = same individual, U = unrelated, FS = full sibling, PO = parent offspring.

## Supplement 2: R script to implement the error-tolerant likelihood-based match calling model and sample clustering algorithms: MSATs

```
# Example code to conduct likelihood-based error-tolerant sample matching and clustering for
# genetic mark recapture studies: multiallelic markers for diploid genotypes.

# Version 1.0-Nov09_2016

# Sethi SA, Linden D, Wenburg J, Lewis C, Lemons P, Fuller A, Hare M

# Overview: This script contains code to implement likelihood-based error-
# tolerant "MSAT" genotype matching, and subsequent stage 1 (within a sampling occasion)
# and stage 2 (between sampling occasions) clustering to identify recaptures.
# See Supplement 1 of Sethi et al. for explanation of methods and description
# of formulae. Below, references are provided indicating source articles from which
# probability models and genotyping error models were derived.
# The intent of this script is to provide example code
# with which to implement likelihood-based error-tolerant genotype matching
# and sample clustering for genetic mark recapture data, however this code is
# not maintained by the authors.

# Contents:
# Section 1: User defined functions
# Section 2: Example data
# Section 3: Stage one clustering to identify repeated captures within a single sampling occasion
# Section 4: Stage two clustering to identify recaptures across sampling occasions
# Section 5: References

### Section 1: User defined functions (load these first) #####

#-----#
# User defined function to calculate the probability of observing a sample genotype at locus j
# given a proposed true latent genotype, Pr(gij|kij).

# Microsatellite (MSAT) two-class genotyping error model from Wang (2004, 2006, 2016)
# P.error.msat() -- Calculates the probability of observing a sample diploid genotype at locus
# j given a true latent genotype k for multiallelic (microsatellite) type markers.
# Two classes of error: allelic dropout (e.g. observed AA from true Aa) and false alleles
# (mistype, e.g. observed Ab from AA). Under Wang's MSAT error model, the following
# assumptions are made:
# a) same per-allele dropout rate and per-allele mistype rate for all alleles at j,
# b) only one dropout possible per locus,
# c) up to two mistype errors can occur per locus,
# d) mistyping errors occur after possibility of dropouts.
# Arguments: rho1 = per-allele allelic dropout rate at locus j; rho2 = per-ALLELE false
# allele (mistype) rate at locus j; a = number of alleles at locus j; gj = observed diploid
# genotype at j; kj = true latent genotype at j. Allelic dropout rates are relevant to true latent
# heterozygotes; false allele rates are relevant to both latent heterozygotes and homozygotes,
# e.g. see Broquet and Petit (2004).
# Input genotypes: NOTE, input genotypes must be two-character strings (e.g. "ab","Bc") and if using
# roman letters, this code is case sensitive. Pairs of alleles are unordered, e.g. "aB" equivalent to "Ba"
# Please code multiallelic loci with many alleles carefully. Coding alleles as lower and upper case
# letters and single numeric digits 0-9, can accommodate loci with 26+26+10 = 62 alleles, and could be
# expanded further if need be with other special characters read in as strings beyond that (e.g. "!" or "@").
P.error.msat <- function(rho1,rho2,a,kj,gj){
  r1 <- rho1/(1+rho1)
  r2 <- rho2/(a-1)
```

```

out.msat <- 1
if(length(unique(strsplit(kj,"")[[1]]))==1){ # homozygous latent
  if(adist(kj,gj)==0){out.msat <- (1-rho2)^2} else # no error manifests
  if((2-sum(unique(strsplit(kj,"")[[1]] %in% unique(strsplit(gj,"")[[1]])))==1 &
    adist(kj,gj)>=1){out.msat <- 2*r2*(1-rho2)} else # one mistype
  if((2-sum(unique(strsplit(kj,"")[[1]] %in% unique(strsplit(gj,"")[[1]])))==2 &
    length(unique(strsplit(gj,"")[[1]]))==2){out.msat <- 2*r2^2} else # two mistypes, different allele manifests
  if((2-sum(unique(strsplit(kj,"")[[1]] %in% unique(strsplit(gj,"")[[1]])))==2 &
    length(unique(strsplit(gj,"")[[1]]))==1){out.msat <- 1*r2^2} # two mistypes, same allele manifests
  } else # end homozygote latent genotype and proceed to heterozygote latent
  {
    if((2-sum(unique(strsplit(kj,"")[[1]] %in% unique(strsplit(gj,"")[[1]])))==0){
      out.msat <- (1-rho2)^2 + r2^2 - 2*r1*(1-rho2-r2)^2 } else # no error manifests
    if((2-sum(unique(strsplit(kj,"")[[1]] %in% unique(strsplit(gj,"")[[1]])))==1 &
      length(unique(strsplit(gj,"")[[1]]))==1){out.msat <- r2*(1-rho2) + r1*(1-rho2-r2)^2} else # allelic dropout
    if((2-sum(unique(strsplit(kj,"")[[1]] %in% unique(strsplit(gj,"")[[1]])))==1 &
      length(unique(strsplit(gj,"")[[1]]))==2){out.msat <- r2*(1-rho2+r2)} else # all else, i.e. one mistype
    if((2-sum(unique(strsplit(kj,"")[[1]] %in% unique(strsplit(gj,"")[[1]])))==2 &
      length(unique(strsplit(gj,"")[[1]]))==2){out.msat <- 2*r2^2} else # two mistypes, different allele manifests
    if((2-sum(unique(strsplit(kj,"")[[1]] %in% unique(strsplit(gj,"")[[1]])))==2 &
      length(unique(strsplit(gj,"")[[1]]))==1){out.msat <- 1*r2^2} # two mistypes, same allele manifests
    } # end else for heterozygote latent genotype
  }
return(out.msat)
} # end P.error.msat

# Example: locus with 10 alleles, observed aA versus true Ab (i.e. latent heterozygote, single mistype)
# with 5% per-LOCUS (translated to per-allele within call) allelic dropout and 2% per-LOCUS false allele
# genotyping error rate:
(P.error.msat(rho1=1 - sqrt(1-0.05), rho2=1 - sqrt(1-0.02), a=10, gj="aA", kj="Ab"))
(P.error.msat(rho1=1 - sqrt(1-0.05), rho2=1 - sqrt(1-0.02), a=10, gj="Aa", kj="bA")) # allele order doesn't matter

#-----#
# User defined functions to calculate probabilities of observing a pair of latent diploid genotypes k_1,k_2
# at locus j, given a proposed relationship state (R), Pr(k_1,k_2|R). These are intermediary to joint.prob.multi() below.
# Inputs: vectors of allele frequencies, f; note, for probability calculations the order of allele
# frequencies passed to a function matters (see comments below). Naming convention of functions indicate
# the homozygous/heterozygous status of the pair of genotypes, the number of alleles in common, and the
# proposed relationship state: Same Individual, Unrelated, Parent Offspring, or Full Sibling. Probability formulae
# are taken from Weir et al. (2006).

# Needed for both biallelic SNPs and MSAT loci with >= 2 alleles at a locus:
# Two homozygous genotypes, two shared alleles
# Arguments: a single allele frequency corresponds to the matching allele
hom.hom2.SI <- function(f){
  return(f[1]^2)
} # End joint genotype probability calculation for observing ii/ii given same individual
hom.hom2.U <- function(f){
  return(f[1]^4)
} # End joint genotype probability calculation for observing ii/ii given two unrelated individuals
hom.hom2.PO <- function(f){
  return(f[1]^3)
} # End joint genotype probability calculation for observing ii/ii given a parent offspring relationship
hom.hom2.FS <- function(f){
  return(0.25*f[1]^2 + 0.5*f[1]^3 + 0.25 * f[1]^4)
} # End joint genotype probability calculation for observing ii/ii given two full siblings

# Two homozygous genotypes, zero shared alleles

```



```

# Arguments: vector of two allele frequencies which correspond to one homozygote and second to the
# other, order doesn't matter
hom.hom0.SI <- function(f){
  return(0)
} # End joint genotype probability calculation for observing ii/jj given same individual
hom.hom0.U <- function(f){
  return(f[1]^2 * f[2]^2)
} # End joint genotype probability calculation for observing ii/jj given two unrelated individuals
hom.hom0.PO <- function(f){
  return(0)
} # End joint genotype probability calculation for observing ii/jj given a parent offspring relationship
hom.hom0.FS <- function(f){
  return(0.25*f[1]^2 * f[2]^2)
} # End joint genotype probability calculation for observing ii/jj given two full siblings

# One homozygote, one heterozygote, one shared allele
# Arguments: vector of two allele frequencies, here the first allele frequency must correspond to the
# homozygous genotype and the second to the novel allele in the heterozygote, e.g. ii/ij => f = c(f_i,f_j).
hom.het1.SI <- function(f){
  return(0)
} # End joint genotype probability calculation for observing ii/ij given same individual
hom.het1.U <- function(f){
  return(2*f[1]^3 * f[2])
} # End joint genotype probability calculation for observing ii/ij given two unrelated individuals
hom.het1.PO <- function(f){
  return(f[1]^2 * f[2])
} # End joint genotype probability calculation for observing ii/ij given a parent offspring relationship
hom.het1.FS <- function(f){
  return(0.5*f[1]^2 * f[2] + 2*0.25*f[1]^3 * f[2])
} # End joint genotype probability calculation for observing ii/ij given two full siblings

# Two heterozygote genotypes, two shared alleles
# Arguments: a vector of two allele frequencies, the first allele corresponds to one allele in the
# heterozygote, and the second the other, order doesn't matter
het.het2.SI <- function(f){
  return(2*f[1] * f[2])
} # End joint genotype probability calculation for observing ij/ij given same individual
het.het2.U <- function(f){
  return(4*f[1]^2 * f[2]^2)
} # End joint genotype probability calculation for observing ij/ij given two unrelated individuals
het.het2.PO <- function(f){
  return(f[1] * f[2] * (f[1] + f[2]) )
} # End joint genotype probability calculation for observing ij/ij given a parent offspring relationship
het.het2.FS <- function(f){
  return( (2*0.25*f[1] * f[2]) + (0.5*f[1] * f[2] * (f[1] + f[2]) ) + (4*0.25*f[1]^2 * f[2]^2) )
} # End joint genotype probability calculation for observing ij/ij given two full siblings

# Needed only for multiallelic loci (e.g. MSATs) with > 2 alleles at a locus
# One homozygote and one heterozygote, zero alleles shared
# Arguments: a vector of three allele frequencies, the first allele frequency must correspond to the homozygous
# genotype and the second and third to the novel alleles in the heterozygote, e.g. ii/jm => f = c(f_i,f_j,f_m)
hom.het0.SI <- function(f){
  return(0)
} # End joint genotype probability calculation for observing ii/jm given same individual
hom.het0.U <- function(f){
  return(2*f[1]^2 * f[2] * f[3])
} # End joint genotype probability calculation for observing ii/jm given two unrelated individuals

```

```

hom.het0.PO <- function(f){
  return(0)
} # End joint genotype probability calculation for observing ii/jm given a parent offspring relationship
hom.het0.FS <- function(f){
  return(2*0.25*f[1]^2 * f[2] * f[3])
} # End joint genotype probability calculation for observing ii/jm given two full siblings

# Two heterozygote genotypes, one allele shared
# Arguments: a vector of three allele frequencies, the first allele corresponds to the common allele,
# the second allele to the unique allele in k1, and the third allele frequency to the unique allele in k2,
# e.g. for ij/im, f = c(f_i,f_j,f_m)
het.het1.SI <- function(f){
  return(0)
} # End joint genotype probability calculation for observing ij/im given same individual
het.het1.U <- function(f){
  return(4*1*f[1]^2 * f[2] * f[3])
} # End joint genotype probability calculation for observing ij/im given two unrelated individuals
het.het1.PO <- function(f){
  return(1*f[1] * f[2] * f[3] )
} # End joint genotype probability calculation for observing ij/im given a parent offspring relationship
het.het1.FS <- function(f){
  return(0.5*f[1] * f[2] * f[3] + 4*0.25*f[1]^2 * f[2] * f[3])
} # End joint genotype probability calculation for observing ij/im given two full siblings

# Two heterozygote genotypes, zero alleles shared
# Here 0 alleles shared in common amongst pair of genotypes
# Arguments: a vector of four allele frequencies; the allele frequency order matches that from each of the four
# unique alleles across the pair of genotypes, e.g. for ij/ml, f=c(i,j,m,l)
het.het0.SI <- function(f){
  return(0)
} # End joint genotype probability calculation for observing ij/ml given same individual
het.het0.U <- function(f){
  return(4*1*f[1] * f[2] * f[3] * f[4])
} # End joint genotype probability calculation for observing ij/ml given two unrelated individuals
het.het0.PO <- function(f){
  return(0)
} # End joint genotype probability calculation for observing ij/ml given a parent offspring relationship
het.het0.FS <- function(f){
  return(4*0.25*f[1] * f[2] * f[3] * f[4])
} # End joint genotype probability calculation for observing ij/ml given two full siblings

#-----#
# User defined function for intermediary calculations of Pr(k1,k2|R) needed later to calculate the likelihood of a hypothesized
# relationship state between a pair of observed multilocus genotypes.

# joint.prob.multi() -- This function outputs a dataframe whereby each row defines a proposed pair of diploid genotypes
# at a locus, and the probability of observing this pair given a true relationship from which the pair of genotypes
# originated, of Same Individual, Unrelated individuals, Parent Offspring, or Full Sibling.
# Arguments: f. is a 1-row numeric object (works with 1-row matrix object or 1-row data.frame object with column
# labels) containing allele frequencies for all alleles at a given locus, and with column
# names corresponding to unique allele names as single character strings (e.g. lowercase letters).
# Please code MSAT loci with many alleles carefully. Coding alleles as lower and upper case letters
# and single numeric digits 0-9, can accommodate loci with 26+26+10 = 62 alleles, and could be expanded with other special
# characters beyond that (e.g. "!" or "@"). Column naming corresponding to unique allele codes is needed to reference
# the correct order of alleles when making probability calculations. Utilizes user defined functions for Pr(k_1,k_2|R)
# above.

```

```

joint.prob.multi <- function(f.){
  # The total number of unique unordered pairs from a set of n unique elements is: n + choose(n,2) = n + (n!) / (2!(n-2)!)
  G.ord <- combn(x=rep(colnames(f.),2),m=2) # this creates all possible ORDERED diploid genotypes combinations with replacement
  G.unord <- unique(names(table(apply(G.ord,MARGIN=2,FUN=function(x){paste(sort(x),collapse="")}))))) # get unique set of unordered pairs
  # A total of, length(G.unord)^2 possible ordered genotype 'dyads' of unique unordered diploid genotypes, with formatting into
  # a dataframe of four columns for four proposed relationship states:
  out <- data.frame(
    k1=rep(G.unord,each=length(G.unord)),
    k2=rep(G.unord,length(G.unord)),
    prob.SI=NA,prob.U=NA,prob.PO=NA,prob.FS=NA)
  # Now set up a series of genotype comparison challenges to come up with appropriate pairwise probability calculation.
  # There are seven total possible allele sharing outcomes to test.
  for(i in 1:nrow(out)){
    # break out each diploid genotype into component alleles for subsequent allele frequency referencing
    g1 <- strsplit(as.character(out$k1[i]), "")[[1]]
    g2 <- strsplit(as.character(out$k2[i]), "")[[1]]
    # hom.hom, 2 shared alleles
    if(length(unique(g1))==1 & length(unique(g2))==1 & length(table(c(g1,g2)))==1){
      out$prob.SI[i] <- hom.hom2.SI(f=f.[1,g1[1]])
      out$prob.U[i] <- hom.hom2.U(f=f.[1,g1[1]])
      out$prob.PO[i] <- hom.hom2.PO(f=f.[1,g1[1]])
      out$prob.FS[i] <- hom.hom2.FS(f=f.[1,g1[1]])
    } else
    # hom.hom, 0 shared alleles
    if(length(unique(g1))==1 & length(unique(g2))==1 & length(table(c(g1,g2)))==2){
      out$prob.SI[i] <- hom.hom0.SI(f=c(f.[1,g1[1]],f.[1,g2[1]]))
      out$prob.U[i] <- hom.hom0.U(f=c(f.[1,g1[1]],f.[1,g2[1]]))
      out$prob.PO[i] <- hom.hom0.PO(f=c(f.[1,g1[1]],f.[1,g2[1]]))
      out$prob.FS[i] <- hom.hom0.FS(f=c(f.[1,g1[1]],f.[1,g2[1]]))
    } else
    # hom.het, 1 shared alleles
    if(length(unique(g1))==1 & length(unique(g2))==2 & length(intersect(g1,g2))==1 |
      length(unique(g1))==2 & length(unique(g2))==1 & length(intersect(g1,g2))==1 ){
      out$prob.SI[i] <- hom.het1.SI(f=f.[1,names(sort(table(c(g1,g2)),decreasing=T))])
      out$prob.U[i] <- hom.het1.U(f=f.[1,names(sort(table(c(g1,g2)),decreasing=T))])
      out$prob.PO[i] <- hom.het1.PO(f=f.[1,names(sort(table(c(g1,g2)),decreasing=T))])
      out$prob.FS[i] <- hom.het1.FS(f=f.[1,names(sort(table(c(g1,g2)),decreasing=T))])
    } else
    # hom.het, 0 shared alleles
    if(length(unique(g1))==1 & length(unique(g2))==2 & length(intersect(g1,g2))==0 |
      length(unique(g1))==2 & length(unique(g2))==1 & length(intersect(g1,g2))==0 ){
      out$prob.SI[i] <- hom.het0.SI(f=f.[1,names(sort(table(c(g1,g2)),decreasing=T))])
      out$prob.U[i] <- hom.het0.U(f=f.[1,names(sort(table(c(g1,g2)),decreasing=T))])
      out$prob.PO[i] <- hom.het0.PO(f=f.[1,names(sort(table(c(g1,g2)),decreasing=T))])
      out$prob.FS[i] <- hom.het0.FS(f=f.[1,names(sort(table(c(g1,g2)),decreasing=T))])
    } else
    # het.het, 2 shared alleles
    if(length(unique(g1))==2 & length(unique(g2))==2 & length(intersect(g1,g2))==2){
      out$prob.SI[i] <- het.het2.SI(f=f.[1,names(sort(table(c(g1,g2)),decreasing=T))])
      out$prob.U[i] <- het.het2.U(f=f.[1,names(sort(table(c(g1,g2)),decreasing=T))])
      out$prob.PO[i] <- het.het2.PO(f=f.[1,names(sort(table(c(g1,g2)),decreasing=T))])
      out$prob.FS[i] <- het.het2.FS(f=f.[1,names(sort(table(c(g1,g2)),decreasing=T))])
    } else
    # het.het, 1 shared alleles
    if(length(unique(g1))==2 & length(unique(g2))==2 & length(intersect(g1,g2))==1){
      out$prob.SI[i] <- het.het1.SI(f=f.[1,names(sort(table(c(g1,g2)),decreasing=T))])
      out$prob.U[i] <- het.het1.U(f=f.[1,names(sort(table(c(g1,g2)),decreasing=T))])
    }
  }
}

```

```

        out$prob.PO[i] <- het.het1.PO(f=f.[1,names(sort(table(c(g1,g2)),decreasing=T))])
        out$prob.FS[i] <- het.het1.FS(f=f.[1,names(sort(table(c(g1,g2)),decreasing=T))])
    } else
# het.het, 0 shared alleles
    if(length(unique(g1))==2 & length(unique(g2))==2 & length(intersect(g1,g2))==0){
        out$prob.SI[i] <- het.het0.SI(f=f.[1,names(sort(table(c(g1,g2)),decreasing=T))])
        out$prob.U[i] <- het.het0.U(f=f.[1,names(sort(table(c(g1,g2)),decreasing=T))])
        out$prob.PO[i] <- het.het0.PO(f=f.[1,names(sort(table(c(g1,g2)),decreasing=T))])
        out$prob.FS[i] <- het.het0.FS(f=f.[1,names(sort(table(c(g1,g2)),decreasing=T))])
    }
    } # end i loop over rows of out matrix
return(out)
} # End joint.prob.multi function

# Examples:
# 5-allele locus, equal allele frequencies
n.allele <- 5
f.df <- matrix(nr=1,nc=length(letters[1:n.allele]),rep(1/n.allele,n.allele))
colnames(f.df) <- letters[1:n.allele]
(joint.prob.multi(f.=f.df))

### Section 2: Example simulated data #####

#-----#
# Simulate diploid "MSAT" type genotype data with potential allelic dropout and mistyping genotyping error.

# MSAT.G.simulator() -- this function produces diploid multilocus genotypes from unrelated individuals
# under a specified set of allele frequencies and genotyping error rates. A list of objects is
# returned: the simulated genotypes with a leading column indexing a generic sampling id, and a last column
# indicating true individual id, followed by all other inputs passed back to the user.
# Arguments: F.sim.ls = a list object where each element is a 1 row matrix of
# allele frequencies and with column names indicating allele names (must be single-character strings, e.g.
# lower case letters or upper case letters) with one row for each locus simulated. Thus, the number of elements
# in the F.sim.ls sets the number of loci. See example below; ADO.locus = vector of locus-level
# (vs. per-allele rate) allelic dropout rates; FA.locus = vector of locus-level (vs. per-allele rate)
# mistype rates; n.unique = total number of unique individuals for which to simulate genotypes;
# id.start = integer at which unique individual id numbering commences; recap.ix = vector indicating which
# of 1:n.unique individuals is recaptured, which can include repeated captures of individuals (e.g.
# recap.ix = c(1,1,2,3)). If left as 'NA', no recaptures are simulated; r.seed = a random number seed.
# If left as 'NA', then no seed is passed. Note, allelic dropout rates are relevant to true latent
# heterozygotes; false allele rates are relevant to both latent heterozygotes and homozygotes,
# e.g. see Broquet and Petit (2004).

MSAT.G.simulator <- function(F.sim.ls,ADO.locus,FA.locus,n.unique,id.start,recap.ix=NA,r.seed=NA){
# Set seed
    if(is.na(r.seed)==F){set.seed(r.seed)}
# Translate locus-level error rate to per-allele rates (same for all loci here)
# ADO
    err.ado <- 1-sqrt(1-ADO.locus)
# FA
    err.fa <- 1-sqrt(1-FA.locus)
# Calculate number recaptures
    if(length(recap.ix)==1 & sum(is.na(recap.ix))==1) {n.recap <- 0} else {n.recap <- length(recap.ix)}
# Declare indexing variables
    n.loci <- length(F.sim.ls)
    col.even <- seq(from=2,to=2*n.loci,by=2)
    col.odd <- seq(from=1,to=2*n.loci,by=2)

```

```

# Set up genotype storage object
G.lat <- data.frame(matrix(nr=n.unique+n.recap,nc=2*n.loci))
# True genotypes for n.unique individuals
for(j in 1:n.loci){
  G.lat[1:n.unique,col.odd[j]] <- sample(colnames(F.sim.ls[[j]]),size=n.unique,prob=F.sim.ls[[j]],replace=T)
  G.lat[1:n.unique,col.even[j]] <- sample(colnames(F.sim.ls[[j]]),size=n.unique,prob=F.sim.ls[[j]],replace=T)
} # end j loop over loci
# Simulate recaptured samples and populate sample and true identifications
if(n.recap>0) {G.lat[(n.unique+1):(n.unique+n.recap),] <- G.lat[recap.ix,]}
# Generate observed genotypes, following the two-class genotyping error (allelic dropout and false allele)
# model as specified in Wang (2004, 2006, 2016)
G.obs <- G.lat
for(j in 1:n.loci){
  # ADO happens first. Following Wang (2004, 2016) ADO model, then no ADO = 1-2*(err.ado[j]/(1+err.ado[j]))
  # and thus prob. dropout is 1-(1-2*(err.ado[j]/(1+err.ado[j]))) = 2*(err.ado[j]/(1+err.ado[j]))
  # Equal chance of allele 1 or 2 dropping out, so for ease, just use first allele if ADO occurs
  temp.err <- rbinom(n=nrow(G.lat),size=1,prob=2*(err.ado[j]/(1+err.ado[j])))
  if(sum(temp.err)>0){G.obs[temp.err==1,col.odd[j]:col.even[j]] <- G.obs[temp.err==1,col.odd[j]]}
  # FA happens second, and 0,1, or 2 alleles can mistype.
  # first allele copy for locus j, across all rows of G matrix
  temp.err <- rbinom(n=nrow(G.obs),size=1,prob=err.fa[j])
  if(sum(temp.err)>0){
    G.obs[temp.err==1,col.odd[j]] <- sapply(G.obs[temp.err==1,col.odd[j]],FUN=function(x){
      sample(colnames(F.sim.ls[[j]])[colnames(F.sim.ls[[j]])!=x],size=1,prob=F.sim.ls[[j]][colnames(F.sim.ls[[j]])!=x],
      replace=T)}}}
  # second allele copy for locus j, across all rows of G matrix
  temp.err <- rbinom(n=nrow(G.lat),size=1,prob=err.fa[j])
  if(sum(temp.err)>0){
    G.obs[temp.err==1,col.even[j]] <- sapply(G.obs[temp.err==1,col.even[j]],FUN=function(x){
      sample(colnames(F.sim.ls[[j]])[colnames(F.sim.ls[[j]])!=x],size=1,prob=F.sim.ls[[j]][colnames(F.sim.ls[[j]])!=x],
      replace=T)}}}
} # end j loop over loci for genotyping error
# Add in columns for sample vs. true identification
if(n.recap>0){G.obs <- cbind(id.start:(id.start-1 + n.unique + n.recap),G.obs,
  c(id.start:(id.start-1+n.unique),(id.start:(id.start-1 + n.unique))[recap.ix]))} else
{G.obs <- cbind(id.start:(id.start-1 + n.unique),G.obs,id.start:(id.start-1 + n.unique))}
colnames(G.obs)[c(1,ncol(G.obs))] <- c("Sample.ID","True.ID")
return(structure(list(G.obs,F.sim.ls,ADO.locus,FA.locus,n.unique,recap.ix,r.seed),
  .Names=c("G.obs","F.sim.ls","ADO.locus","FA.locus","n.unique","recap.ix","r.seed")))
} # end function MSAT.G.simulator()

# Examples:
# Generate an example data set for stage-1 clustering with which to identify within-sampling occasion recaptures.
# 10 "MSAT" loci each with 5 equal frequency alleles, a 5% allelic dropout error rate and 2% locus-level false
# allele rate. Generate multilocus genotypes for 15 unique unrelated individuals, a double recapture of individual 1,
# and single recaptures of individuals 2-4.
# Simulation parameters:
num.loci=10; num.allele=5; allele.names=letters[1:num.allele]
F.ls <- lapply(1:num.loci,FUN=function(j){
  x <- t(as.matrix(rep(1/num.allele,num.allele)));
  colnames(x) <- allele.names;
  return(x)})
Ss1.sim <- MSAT.G.simulator(F.sim.ls=F.ls, ADO.locus = rep(0.05,num.loci), FA.locus = rep(0.02,num.loci),
  n.unique = 15, id.start=100,recap.ix = c(1,1,2,3,4),r.seed = 1)

# Generate a pair of genotype data sets for testing of stage-2 sample clustering to identify between-sampling occasion
# recaptures. Set 1, as above but made up of 20 unique individuals. Set 2 made up of 5 recaptures from Set 1, and

```

```

# 15 unique unrelated individuals.
Ss2_1.sim <- MSAT.G.simulator(F.sim.ls=F.ls, ADO.locus = rep(0.05,num.loci), FA.locus = rep(0.02,num.loci),
  n.unique = 20, id.start=100,recap.ix = NA,r.seed = 2)
Ss2_2.sim <- MSAT.G.simulator(F.sim.ls=F.ls, ADO.locus = rep(0.05,num.loci), FA.locus = rep(0.02,num.loci),
  n.unique = 15, id.start=200,recap.ix = NA,r.seed = 3)
Ss2_2.sim$G.obs <- rbind(Ss2_2.sim$G.obs,Ss2_1.sim$G.obs[1:5,]) # create recaptures in sampling occasion 2
# repopulate a generic sample ID number for occasion 2
Ss2_2.sim$G.obs$Sample.ID <- Ss2_2.sim$G.obs$Sample.ID[1]:(Ss2_2.sim$G.obs$Sample.ID[1] + nrow(Ss2_2.sim$G.obs)-1)

### Section 3: Stage-one clustering to identify repeated captures within a single sampling occasion #####
#-----#
# Inputs
# Get genotype data from a single capture occasion.
# NOTE: Input genotype data need have in column 1 a sample ID, followed by a column for
# each allele copy for each diploid locus. Allele calls need be single character strings.
# Please code MSAT loci with many alleles carefully. Coding alleles as lower and upper case
# letters and single numeric digits 0-9, can accommodate loci with 26+26+10 = 62 alleles, and could be
# expanded further if need be with other special characters read in as strings beyond that (e.g. "!" or "@").
# See example output from MSAT.G.simulator() for input genotype formatting examples.
S.input <- Ss1.sim$G.obs[,1:(ncol(Ss1.sim$G.obs)-1)] # Don't need the true individual ID column
# Get allele frequency matrix. Format: a list object where each element is a 1 row matrix of allele
# frequencies and with column names indicating allele nameswith one row for each locus simulated. Thus,
# the number of elements in the F.sim.ls sets the number of loci.
F.m <- Ss1.sim$F.sim.ls # F.sim.m
# Declare vectors of locus-level error rates
# ADO
err.ado.l <- Ss1.sim$ADO.locus
# FA
err.fa.l <- Ss1.sim$FA.locus

#-----#
# Initialize intermediate quantities and storage objects
# Get number of alleles at each locus
n.allele <- sapply(F.m,FUN=function(x){length(x)})
# Get number of loci
n.loci <- length(F.m)
# Convert locus-level error rates to per-allele rates
# ADO
err.ado <- 1-sqrt(1-err.ado.l)
# FA
err.fa <- 1-sqrt(1-err.fa.l)

# Given the input allele frequencies, define joint probabilities given different relationship states,
# using the joint.prob.multi() user defined function. Can take time to generate if many alleles at loci.
# The idea is to calculate this once, and then reference relevant genotype pairs during the clustering
# loop later.
joint.prob.ls <- list()
for(L in 1:length(F.m)){
  joint.prob.ls[[L]] <- joint.prob.multi(f.=F.m[[L]])
}
# Column indexing vector--be careful here, this relies on specific format of input genotypes (see above).
col.even <- seq(from=2,to=ncol(S.input)-1,by=2)
col.odd <- seq(from=3,to=ncol(S.input),by=2)
# Initialize storage variables, helper functions
n.prob.ls <- sapply(joint.prob.ls,FUN=function(x){nrow(x)})
# Helper function

```

```

`%notin%`<- Negate(`%in%`)
# Storage matrix for L(observed genotypes in pair of sets | relationship) at each locus, j.
# A matrix of dimension rows = # loci, cols = 4 (in order, SI, U, PO, FS)
LRG1G2j <- matrix(nr=n.loci,nc=4,1)
colnames(LRG1G2j) <- c("SI","U","PO","FS") # assign colnames to object for record keeping/debugging
# Storage for Likelihood product across all (assumed independent) loci
LRG1G2 <- 1:4 # L| SI, U, PO, FS

#-----#
# Stage-one clustering in action. This code contains several error traps; see code comments below.
# Step 1: Intialize the clustering algorithm with all samples as singleton sets, a list object with sample IDs.
S <- list()
for(z in 1:nrow(S.input)){S[[z]] <- S.input[z,1]} # sample ID taken from first column
S.old <- S # temporary copy
# Steps 2-3: Pairwise comparisons for match calls, repeating until set membership stops changing
repeat{
  S.old <- S
  for(i in 1:length(S)){
    # Likelihood ratio and set membership sample ID labels placeholders; need list objects here s.t.
    # a given element can hold more than one multilocus genotype if need be.
    temp.rat.sc <- list()
    temp.rat.mr <- list()
    # Indexing variable place holder
    ix1 <- 0
    # Exit trap, don't make a match comparison if S[[i]] set is NA, i.e. G1 is empty set
    if(sum(is.na(S[[i]]))>0) {next}
    # Indexing construct for i and k>i results in all unique pairwise comparisons across sets
    for(k in (1:length(S))[(1:length(S))>i]){
      # Get the pair of sets of genotypes to compare
      G1 <- S.input[S.input[,1]%in%S[[i]],]
      G2 <- S.input[S.input[,1]%in%S[[k]],]
      # Exit trap, if G2 is empty set proceed to next k
      if(nrow(G2)==0) {next}
      # Determine which are common positive PCR loci, i.e. the set of loci for which both samples
      # have any genotype call. Note, the below code still works when a given G1 or G2 set has multiple
      # elements.
      pos.loci.ix <- col.even[(nrow(G1)-colSums(is.na(G1[col.even])))>0 &
        (nrow(G2)-colSums(is.na(G2[col.even])))>0]/2
      # Update indexing variable
      ix1 <- ix1+1
      # Exit trap, if pos.loci.ix is zero, implying no common loci with genotypes which can happen with real-world
      # data with failed PCR outcomes across some loci. One could impose a common-loci minimum threshold here
      # as well. Note, exit in this case results in retaining separation of the two compared sample sets, implying
      # they derive from separate individuals.
      if(length(pos.loci.ix)==0) {
        # store index information for compared sets, and evidence ratio
        temp.rat.sc[[ix1]] <- G2[,1]
        temp.rat.mr[[ix1]] <- 0 # force to zero
        next
      } # end if
    }
  }
# Make calculations for likelihood across loci, Lj(R_(1,2)), for each locus
for(j in 1:n.loci){
  # First, determine whether there is missing genotype info among the two compared sets at this locus,
  # using pos.loci.ix from above. If yes, pass a 1.0 value which will not affect likelihood
  # multiplication subsequently (i.e. Like * 1 = Like).
  if(j %notin% pos.loci.ix){
    LRG1G2j[j,1:4] <- rep(1,4)
  }
}

```

```

    next} # end if; 'next' goes to next locus
# Reference the set of possible pairs of genotypes at a given locus and associated joint probabilities
# calculated with joint.prob.multi() outside the clustering algorithm, Pr(kj1,kj2|R),
temp.prob <- joint.prob.ls[[j]]
# Calculate the probability of observed genotypes given proposed latent genotypes, Pr(gj|kj).
# This code accomodates multiple genotypes within a set, e.g. if after an
# iteration of the clustering algorithm, it is found that two samples from a single individual are
# grouped into one set.
# Storage vector, defined relevant to number of alleles at locus j
Pg1_k1 <- rep(1,n.prob.ls[[j]])
Pg2_k2 <- Pg1_k1
for(ii in 1:nrow(G1)){
  # First, determine whether there is a missing locus; if yes, then exit
  if(sum(is.na(G1[ii,(col.even[j]:col.odd[j])]))>0){next}
  # Else, populate Pr(gj|kj) for all possible kj
  Pg1_k1[1:n.prob.ls[[j]]] <- Pg1_k1 * sapply(temp.prob$k1, FUN=function(x){
    P.error.msat(rho1=err.ado[j],rho2=err.fa[j],a=n.allele[j],
    gj=paste(G1[ii,(col.even[j]:col.odd[j]),collapse=""),kj=as.character(x))})
  }
  for(ii in 1:nrow(G2)){
    if(sum(is.na(G2[ii,(col.even[j]:col.odd[j])]))>0){next}
    Pg2_k2[1:n.prob.ls[[j]]] <- Pg2_k2 * sapply(temp.prob$k2, FUN=function(x){
      P.error.msat(rho1=err.ado[j],rho2=err.fa[j],a=n.allele[j],
      gj=paste(G2[ii,(col.even[j]:col.odd[j]),collapse=""),kj=as.character(x))})
    }
  }
  # Crossproducts to sum over all combinations of Pr(k1k2|R) * Pr(g1|k1) * Pr(g2|k2) at this locus
  LRG1G2j[j,1] <- as.numeric(temp.prob$prob.SI) %**% (Pg1_k1*Pg2_k2)
  LRG1G2j[j,2] <- as.numeric(temp.prob$prob.U) %**% (Pg1_k1*Pg2_k2)
  LRG1G2j[j,3] <- as.numeric(temp.prob$prob.PO) %**% (Pg1_k1*Pg2_k2)
  LRG1G2j[j,4] <- as.numeric(temp.prob$prob.FS) %**% (Pg1_k1*Pg2_k2)
} # end j loop over loci
# Now product across loci, L(R_(1,2))
LRG1G2 <- apply(LRG1G2j,MARGIN=2,FUN=prod)
# Store index information for compared sets, and likelihood ratios of L(R_(1,2)=SI)/L(R_(1,2)=other).
# See Wang(2004,2006,2016), Kalinowski et al. (2006), and Supplement 1 to this article for details
# on the sample matching likelihood ratio model.
temp.rat.sc[[ix1]] <- G2[,1]
temp.rat.mr[[ix1]] <- LRG1G2[1]/max(LRG1G2[2:4],na.rm=T)
} # end k loop over all samples > i (pairwise combos)
# Update set membership by combining G2 into G1 if max likelihood ratio > 1.0
if(length(temp.rat.mr)>0){
  # As written here, temp.Sample.Code can be multiple different sets if more than one
  # set produces a max evidence ratio
  temp.rat.mr.v <- unlist(temp.rat.mr)
  temp.Sample.Code <-
  unlist(temp.rat.sc[temp.rat.mr.v==max(temp.rat.mr.v,na.rm=T) & temp.rat.mr.v>1.0])
  } else {temp.Sample.Code <- NULL}
  S[[i]] <- c(S[[i]],temp.Sample.Code)
# Now remove the sample codes from the singleton sets such that it isn't considered for
# allocation again later
if(length(temp.Sample.Code)>0){
  S[unlist( lapply(S,FUN=function(x){sum(x%in%temp.Sample.Code)==length(x)}) )] <- NA
  } # end if
} # end i loop
S <- lapply(S, function(x) x[!is.na(x)]) # Cleaning up
S <- S[lapply(S,length)>0] # Cleaning up
if(identical(S,S.old)==TRUE){break}

```



```

} # End repeat when no new updating, step 4.

# Convert the final S list to a matrix object to examine clustering
S.m <- matrix(nr=length(S),nc=max(unlist(lapply(S,FUN=length))),NA )
for(r in 1:nrow(S.m)){
  S.m[r,1:length(S[[r]])] <- S[[r]]
} # end r loop
# print
S.m # Unique individuals along rows, any corresponding recaptures' Sample IDs in column 2+
Ss1.sim$G.obs[,c("Sample.ID","True.ID")] # Cross reference Sample IDs to verify recapture identity

### Section 4: Stage two clustering to identify recaptures across sampling occasions #####
#-----#
# Inputs
# Get genotype data from a pair of capture occasions.
# NOTE: Input genotype data need have in column 1 a sample ID, followed by a column for
# each allele copy for each diploid locus. Allele calls need be single character strings.
# Please code MSAT loci with many alleles carefully. Coding alleles as lower and upper case
# letters and single numeric digits 0-9, can accommodate loci with 26+26+10 = 62 alleles, and could be
# expanded further if need be with other special characters read in as strings beyond that (e.g. "!" or "@").
# See example output from MSAT.G.simulator() for input genotype formatting examples.
S1.input <- Ss2_1.sim$G.obs[,1:(ncol(Ss2_1.sim$G.obs)-1)] # Don't need the true individual ID column
S2.input <- Ss2_2.sim$G.obs[,1:(ncol(Ss2_2.sim$G.obs)-1)] # Don't need the true individual ID column
# Get allele frequency matrix. Format: a list object where each element is a 1 row matrix of allele
# frequencies and with column names indicating allele names with one row for each locus simulated. Thus,
# the number of elements in the F.sim.ls sets the number of loci.
F.m <- Ss1.sim$F.sim.ls # F.sim.m
# Declare vectors of locus-level error rates
# ADO
err.ado.l <- Ss2_1.sim$ADO.locus
# FA
err.fa.l <- Ss2_1.sim$FA.locus

#-----#
# Initialize intermediate quantities and storage objects
# Get number of alleles at each locus
n.allele <- sapply(F.m,FUN=function(x){length(x)})
# Get number of loci
n.loci <- length(F.m)
# Convert locus-level error rates to per-allele rates
# ADO
err.ado <- 1-sqrt(1-err.ado.l)
# FA
err.fa <- 1-sqrt(1-err.fa.l)

# Given the input allele frequencies, define joint probabilities given different relationship states,
# using the joint.prob.multi() user defined function. Can take time to generate if many alleles at loci.
# The idea is to calculate this once, and then reference relevant genotype pairs during the clustering
# loop later.
joint.prob.ls <- list()
for(L in 1:length(F.m)){
  joint.prob.ls[[L]] <- joint.prob.multi(f.=F.m[[L]])
}
# Column indexing vector--be careful here, this relies on specific format of input genotypes (see above).
col.even <- seq(from=2,to=ncol(S.input)-1,by=2)
col.odd <- seq(from=3,to=ncol(S.input),by=2)
# Initialize storage variables, helper functions

```

```

n.prob.ls <- sapply(joint.prob.ls,FUN=function(x){nrow(x)})
# Helper function
`%notin%` <- Negate(`%in%`)
# Storage matrix for L(observed genotypes in pair of sets | relationship) at each locus, j.
# A matrix of dimension rows = # loci, cols = 4 (in order, SI, U, PO, FS)
LRG1G2j <- matrix(nr=n.loci,nc=4,1) # SI, U, PO, FS is order
colnames(LRG1G2j) <- c("SI","U","PO","FS") # assign colnames to object for record keeping/debugging
# Storage for Likelihood product across all (assumed independent) loci
LRG1G2 <- 1:4 # L| SI, U, PO, FS

#-----#
# Stage-two clustering in action. This code contains several error traps; see code comments below.
# Intialize the clustering algorithm with all samples as singleton sets, list objects with sample IDs.
S1 <- list()
S2 <- list()
for(z in 1:nrow(S1.input)){S1[[z]] <- S1.input[z,1]} # sample ID is in first column
for(z in 1:nrow(S2.input)){S2[[z]] <- S2.input[z,1]}
# Steps 1-2: Pairwise comparisons for match calls
for(i in 1:length(S1)){
  # Likelihood ratio and set membership sample ID labels placeholders; need list objects here s.t.
  # a given element can hold more than one multilocus genotype if need be.
  temp.rat.sc <- list()
  temp.rat.mr <- list()
  # Indexing variable place holder
  ix1 <- 0
  # Exit trap, don't make a match comparison if S1[[i]] set is NA, i.e. G1 is empty set
  if(sum(is.na(S1[[i]]))>0) {next}
  # Indexing across sampling occasions, compare each ith sample in S1 to all samples in S2 for recaptures
  for(k in 1:length(S2)){
    # Get the pair of sets of genotypes to compare
    G1 <- S1.input[S1.input[,1]%in%S1[[i]],]
    G2 <- S2.input[S2.input[,1]%in%S2[[k]],]
    # Exit trap, if G2 is empty set proceed to next k
    if(nrow(G2)==0) {next}
    # Determine which are common positive PCR loci, i.e. the set of loci for which both samples
    # have any genotype call. Note,the below code still works when a given G1 or G2 set has multiple
    # elements
    pos.loci.ix <- col.even[(nrow(G1)-colSums(is.na(G1[col.even])))>0 &
      (nrow(G2)-colSums(is.na(G2[col.even])))>0]/2
    # Update indexing variable
    ix1 <- ix1+1
    # Exit trap, if pos.loci.ix is zero, implying no common loci with genotypes which can happen with real-world
    # data with failed PCR outcomes across some loci. One could impose a common-loci minimum threshold here
    # as well. Note, exit in this case results in retaining separation of the two compared sample sets, implying
    # they derive from separate individuals.
    if(length(pos.loci.ix)==0) {
      # store index information for compared sets, and evidence ratio
      temp.rat.sc[[ix1]] <- G2[,1]
      temp.rat.mr[[ix1]] <- 0 # force to zero
      next
    } # end if
  } # Make calculations for likelihood across loci, Lj(R_(1,2)), for each locus
  for(j in 1:n.loci){
    # First, determine whether there is missing genotype info among the two compared sets at this locus,
    # using pos.loci.ix from above. If yes, pass a 1.0 value which will not affect likelihood
    # multiplication subsequently (i.e. Like * 1 = Like).
    if(j %notin% pos.loci.ix){

```

```

    LRG1G2j[j,1:4] <- rep(1,4)
    next} # end if; 'next' goes to next locus
# Reference the set of possible pairs of genotypes at a given locus and associated joint probabilities
# calculated with joint.prob.multi() outside the clustering algorithm, Pr(kj1,kj2|R),
temp.prob <- joint.prob.ls[[j]]
# Calculate the probability of observed genotypes given proposed latent genotypes, Pr(gj|kj).
# This code accomodates multiple genotypes within a set, e.g. if after an
# iteration of the clustering algorithm, it is found that two samples from a single individual are
# grouped into one set.
# Storage vector, defined relevant to number of alleles at locus j
Pg1_k1 <- rep(1,n.prob.ls[[j]])
Pg2_k2 <- Pg1_k1
for(ii in 1:nrow(G1)){
  # First, determine whether there is a missing loci; if yes, then exit
  if(sum(is.na(G1[ii,(col.even[j]:col.odd[j])]))>0){next}
  # Else, populate Pr(gj|kj) for all possible kj
  Pg1_k1[1:n.prob.ls[[j]]] <- Pg1_k1 * sapply(temp.prob$k1, FUN=function(x){
    P.error.msat(rho1=err.ado[j],rho2=err.fa[j],a=n.allele[j],
      gj=paste(G1[ii,(col.even[j]:col.odd[j])],collapse=""),kj=as.character(x)))
  })
}
for(ii in 1:nrow(G2)){
  if(sum(is.na(G2[ii,(col.even[j]:col.odd[j])]))>0){next}
  Pg2_k2[1:n.prob.ls[[j]]] <- Pg2_k2 * sapply(temp.prob$k2, FUN=function(x){
    P.error.msat(rho1=err.ado[j],rho2=err.fa[j],a=n.allele[j],
      gj=paste(G2[ii,(col.even[j]:col.odd[j])],collapse=""),kj=as.character(x)))
  })
}
# Crossproducts to sum over all combinations of Pr(k1k2|R) * Pr(g1|k1) * Pr(g2|k2) at this locus
LRG1G2j[j,1] <- as.numeric(temp.prob$prob.SI) %**% (Pg1_k1*Pg2_k2)
LRG1G2j[j,2] <- as.numeric(temp.prob$prob.U) %**% (Pg1_k1*Pg2_k2)
LRG1G2j[j,3] <- as.numeric(temp.prob$prob.PO) %**% (Pg1_k1*Pg2_k2)
LRG1G2j[j,4] <- as.numeric(temp.prob$prob.FS) %**% (Pg1_k1*Pg2_k2)
} # end j loop over loci
# Now product across loci, L(R_(1,2))
LRG1G2 <- apply(LRG1G2j,MARGIN=2,FUN=prod)
# Store index information for compared sets, and likelihood ratios of L(R_(1,2)=SI)/L(R_(1,2)=other).
# See Wang(2004,2006,2016), Kalinowski et al. (2006), and Supplement 1 to this article for details
# on the sample matching likelihood ratio model.
temp.rat.sc[[ix1]] <- G2[,1]
temp.rat.mr[[ix1]] <- LRG1G2[1]/max(LRG1G2[2:4],na.rm=T)
} # end k loop over all samples > i (pairwise combos)
# Update set membership by combining G2 into G1 if max likelihood ratio > 1.0
if(length(temp.rat.mr)>0){
  # As written here, temp.Sample.Code can be multiple different sets if more than one
  # set produces a max evidence ratio
  temp.rat.mr.v <- unlist(temp.rat.mr)
  temp.Sample.Code <-
    unlist(temp.rat.sc[temp.rat.mr.v==max(temp.rat.mr.v,na.rm=T) & temp.rat.mr.v>1.0])
  } else {temp.Sample.Code <- NULL}
S1[[i]] <- c(S1[[i]],temp.Sample.Code)
# Now remove the sample codes from the singleton sets in S2 such that it isn't considered for
# allocation again later
if(length(temp.Sample.Code)>0){
  S2[unlist(lapply(S2,FUN=function(x){sum(x%in%temp.Sample.Code)==length(x)}) )] <- NA
  } # end if
} # end i loop
S2 <- lapply(S2, function(x) x[!is.na(x)]) # Cleaning up
S2 <- S2[lapply(S2,length)>0] # Cleaning up

```

```

# Convert the final S1 list to a matrix object to examine clustering. Those rows (sets) with > 2 members
# indicate the sample IDs captured in both occasion one and occasion
S.m <- matrix(nr=length(S1),nc=max(unlist(lapply(S1,FUN=length))),NA )
for(r in 1:nrow(S.m)){
  S.m[r,1:length(S1[[r]])] <- S1[[r]]
} # end r loop
# print
S.m # Sample IDs from Set 1 in column 1 and any corresponding recaptures' Sample IDs in column 2
Ss2_2.sim$G.obs[,c("Sample.ID","True.ID")] # Cross reference Sample IDs to verify recapture identity

### Section 5: References #####
# Broquet T, Petit E. 2004 Quantifying genotyping errors in noninvasive population
# genetics. Molecular Ecology 13, 3601-3608.
# Kalinowski ST, Taper ML, Creel S. 2006 Using DNA from non-invasive
# samples to identify individuals and census populations: an evidential
# approach tolerant of genotyping errors. Conserv. Genet. 7, 319-329.
# Wang J. 2004 Sibship reconstruction from genetic data with typing errors.
# Genetics 166, 1963-1979.
# Wang J. 2006 Informativeness of genetic markers for pairwise relationship
# and relatedness inference. Theor. Popul. Biol. 70, 300-321.
# Wang J. 2016 Individual identification from genetic marker data: developments
# and accuracy comparisons of methods. Mol. Ecol. Resour. 16, 163-175.
# Weir B, Anderson AD, Hepler AB. 2006 Genetic relatedness analysis: modern
# data and new challenges. Nat. Rev. Genet. 7, 771-780.

```

### Supplement 3: R script to implement the error-tolerant likelihood-based match calling model and sample clustering algorithms: SNPs

```
# Example code to conduct likelihood-based error-tolerant sample matching and clustering for
# genetic mark recapture studies: biallelic markers for diploid genotypes.

# Version 1.0-Nov09_2016

# Sethi SA, Linden D, Wenburg J, Lewis C, Lemons P, Fuller A, Hare M

# Overview: This script contains code to implement likelihood-based error-
# tolerant "SNP" genotype matching, and subsequent stage 1 (within a sampling occasion)
# and stage 2 (between sampling occasions) clustering to identify recaptures.
# See Supplement 1 of Sethi et al. for explanation of methods and description
# of formulae. Below, references are provided indicating source articles from which
# probability models and genotyping error models were derived.
# The intent of this script is to provide example code
# with which to implement likelihood-based error-tolerant genotype matching
# and sample clustering for genetic mark recapture data, however this code is
# not maintained by the authors.

# Contents:
# Section 1: User defined functions
# Section 2: Example data simulation
# Section 3: Stage one clustering to identify repeated captures within a single sampling occasion
# Section 4: Stage two clustering to identify recaptures across sampling occasions
# Section 5: References

### Section 1: User defined functions (load these first) #####

#-----#
# User defined function to calculate the probability of observing a sample genotype at a locus
# given a proposed true latent genotype, Pr(gij|kij).

# SNP genotyping error model
# P.error.snp() -- Calculates the probability of observing a sample genotype at locus j given a true
# latent genotype k for biallelic SNP markers.
# Arguments: gamma_j = per-allele SNP genotyping error rate at locus j; n.a = total number of alleles
# assessed for discrepancies (i.e. for biallelic SNPs this is 2*number of genotypes assessed at locus j);
# d_gk = number of alleles discrepant between observed genotype g and latent genotype k in assessing
# n.a total alleles
P.error.snp <- function(gamma_j, d_gk, n.a){
  return( (gamma_j)^(d_gk) * (1-gamma_j)^(n.a-d_gk) )
}
# Example: observed aA versus true AA with 5% per-LOCUS genotyping error rate:
(P.error.snp(gamma_j = 1 - sqrt(1-0.05), n.a = 2*1, d_gk = 1))
# Example: observed {aA,aa} versus true AA with 5% per-LOCUS genotyping error rate:
(P.error.snp(gamma_j = 1 - sqrt(1-0.05), n.a = 2*2, d_gk = 3))

#-----#
# User defined functions to calculate probabilities of observing a pair of latent diploid genotypes k1,k2
# at locus j, given a proposed relationship state (R), Pr(k1,k2|R). These are intermediary to joint.prob.multi() below.
# Inputs: vectors of allele frequencies, f; note, for probability calculations the order of allele
# frequencies passed to a function matters (see comments below). Naming convention of functions indicate
# the homozygous/heterozygous status of the pair of genotypes, the number of alleles in common, and the
# proposed relationship state: Same Individual, Unrelated, Parent Offspring, or Full Sibling. Probability formulae
# are taken from Weir et al. (2006).
```

```

# Needed for both biallelic SNPs and MSAT loci with >= 2 alleles at a locus. Note, due to the biallelic
# nature of SNP markers, probability calculations for pairs of diploid genotypes involving > 2 alleles are not
# needed (i.e. hom.het0, het.het0, and het.het1)
# Two homozygous genotypes, two shared alleles
# Arguments: a single allele frequency corresponds to the matching allele
hom.hom2.SI <- function(f){
  return(f[1]^2)
} # End joint genotype probability calculation for observing ii/ii given same individual
hom.hom2.U <- function(f){
  return(f[1]^4)
} # End joint genotype probability calculation for observing ii/ii given two unrelated individuals
hom.hom2.PO <- function(f){
  return(f[1]^3)
} # End joint genotype probability calculation for observing ii/ii given a parent offspring relationship
hom.hom2.FS <- function(f){
  return(0.25*f[1]^2 + 0.5*f[1]^3 + 0.25 * f[1]^4)
} # End joint genotype probability calculation for observing ii/ii given two full siblings

# Two homozygous genotypes, zero shared alleles
# Arguments: vector of two allele frequencies which correspond to one homozygote and second to the
# other, order doesn't matter
hom.hom0.SI <-function(f){
  return(0)
} # End joint genotype probability calculation for observing ii/jj given same individual
hom.hom0.U <- function(f){
  return(f[1]^2 * f[2]^2)
} # End joint genotype probability calculation for observing ii/jj given two unrelated individuals
hom.hom0.PO <- function(f){
  return(0)
} # End joint genotype probability calculation for observing ii/jj given a parent offspring relationship
hom.hom0.FS <- function(f){
  return(0.25*f[1]^2 * f[2]^2)
} # End joint genotype probability calculation for observing ii/jj given two full siblings

# One homozygote, one heterozygote, one shared allele
# Arguments: vector of two allele frequencies, here the first allele frequency must correspond to the
# homozygous genotype and the second to the novel allele in the heterozygote, e.g. ii/ij => f = c(f_i,f_j).
hom.het1.SI <- function(f){
  return(0)
} # End joint genotype probability calculation for observing ii/ij given same individual
hom.het1.U <- function(f){
  return(2*f[1]^3 * f[2])
} # End joint genotype probability calculation for observing ii/ij given two unrelated individuals
hom.het1.PO <- function(f){
  return(f[1]^2 * f[2])
} # End joint genotype probability calculation for observing ii/ij given a parent offspring relationship
hom.het1.FS <- function(f){
  return(0.5*f[1]^2 * f[2] + 2*0.25*f[1]^3 * f[2])
} # End joint genotype probability calculation for observing ii/ij given two full siblings

# Two heterozygote genotypes, two shared alleles
# Arguments: a vector of two allele frequencies, the first allele corresponds to one allele in the
# heterozygote, and the second the other, order doesn't matter
het.het2.SI <- function(f){
  return(2*f[1] * f[2])
} # End joint genotype probability calculation for observing ij/ij given same individual

```

```

het.het2.U <- function(f){
  return(4*f[1]^2 * f[2]^2)
} # End joint genotype probability calculation for observing ij/ij given two unrelated individuals
het.het2.PO <- function(f){
  return(f[1] * f[2] * (f[1] + f[2]))
} # End joint genotype probability calculation for observing ij/ij given a parent offspring relationship
het.het2.FS <- function(f){
  return( (2*0.25*f[1] * f[2]) + (0.5*f[1] * f[2] * (f[1] + f[2])) + (4*0.25*f[1]^2 * f[2]^2) )
} # End joint genotype probability calculation for observing ij/ij given two full siblings

#-----#
# User defined function for intermediary calculations of Pr(k1,k2|R) needed later to caculate the likelihood of a hypothesized
# relationship state between a pair of observed multilocus genotypes.

# joint.prob.multi() -- This function outputs a dataframe whereby each row defines a proposed pair of diploid genotypes
# at a locus, and the probability of observing this pair given a true relationship from which the pair of genotypes
# originated, of Same Individual, Unrelated individuals, Parent Offspring, or Full Sibling.
# Arguments: f. is a 1-row numeric object (works with 1-row matrix object or 1-row data.frame object with column
# labels) containing allele frequencies for all alleles at a given locus, and with column
# names corresponding to unique allele names as single character strings (e.g. lowercase letters).
# Column naming corresponding to unique allele codes is needed to reference the correct
# order of alleles when making probability calculations. Utilizes user defined functions for Pr(k_1,k_2|R)
# above.

joint.prob.multi <- function(f.){
  # The total number of unique unordered pairs from a set of n unique elements is: n + choose(n,2) = n + (n!) / (2!(n-2)!)
  G.ord <- combn(x=rep(colnames(f.),2),m=2) # this creates all possible ORDERED diploid genotypes combinations with replacement
  G.unord <- unique(names(table(apply(G.ord,MARGIN=2,FUN=function(x){paste(sort(x),collapse="")}))))) # get unique set of unordered pairs
  # A total of, length(G.unord)^2 possible ordered genotype 'dyads' of unique unordered diploid genotypes, with formatting into
  # a dataframe of four columns for four proposed relationship states:
  out <- data.frame(
    k1=rep(G.unord,each=length(G.unord)),
    k2=rep(G.unord,length(G.unord)),
    prob.SI=NA,prob.U=NA,prob.PO=NA,prob.FS=NA)
  # Now set up a series of genotype comparison challenges to come up with appropriate pairwise probability calculation.
  # There are seven total possible allele sharing outcomes to test.
  for(i in 1:nrow(out)){
    # break out each diploid genotype into component alleles for subsequent allele frequency referencing
    g1 <- strsplit(as.character(out$k1[i]), "")[[1]]
    g2 <- strsplit(as.character(out$k2[i]), "")[[1]]
    # hom.hom, 2 shared alleles
    if(length(unique(g1))==1 & length(unique(g2))==1 & length(table(c(g1,g2)))==1){
      out$prob.SI[i] <- hom.hom2.SI(f=f.[1,g1[1]])
      out$prob.U[i] <- hom.hom2.U(f=f.[1,g1[1]])
      out$prob.PO[i] <- hom.hom2.PO(f=f.[1,g1[1]])
      out$prob.FS[i] <- hom.hom2.FS(f=f.[1,g1[1]])
    } else
    # hom.hom, 0 shared alleles
    if(length(unique(g1))==1 & length(unique(g2))==1 & length(table(c(g1,g2)))==2){
      out$prob.SI[i] <- hom.hom0.SI(f=c(f.[1,g1[1]],f.[1,g2[1]]))
      out$prob.U[i] <- hom.hom0.U(f=c(f.[1,g1[1]],f.[1,g2[1]]))
      out$prob.PO[i] <- hom.hom0.PO(f=c(f.[1,g1[1]],f.[1,g2[1]]))
      out$prob.FS[i] <- hom.hom0.FS(f=c(f.[1,g1[1]],f.[1,g2[1]]))
    } else
    # hom.het, 1 shared alleles
    if(length(unique(g1))==1 & length(unique(g2))==2 & length(intersect(g1,g2))==1 |
      length(unique(g1))==2 & length(unique(g2))==1 & length(intersect(g1,g2))==1 ){

```

```

        out$prob.SI[i] <- hom.het1.SI(f=f.[1,names(sort(table(c(g1,g2)),decreasing=T))])
        out$prob.U[i] <- hom.het1.U(f=f.[1,names(sort(table(c(g1,g2)),decreasing=T))])
        out$prob.PO[i] <- hom.het1.PO(f=f.[1,names(sort(table(c(g1,g2)),decreasing=T))])
        out$prob.FS[i] <- hom.het1.FS(f=f.[1,names(sort(table(c(g1,g2)),decreasing=T))])
    } else
    # het.het, 2 shared alleles
    if(length(unique(g1))==2 & length(unique(g2))==2 & length(intersect(g1,g2))==2){
        out$prob.SI[i] <- het.het2.SI(f=f.[1,names(sort(table(c(g1,g2)),decreasing=T))])
        out$prob.U[i] <- het.het2.U(f=f.[1,names(sort(table(c(g1,g2)),decreasing=T))])
        out$prob.PO[i] <- het.het2.PO(f=f.[1,names(sort(table(c(g1,g2)),decreasing=T))])
        out$prob.FS[i] <- het.het2.FS(f=f.[1,names(sort(table(c(g1,g2)),decreasing=T))])
    } # else
    } # end i loop over rows of out matrix
return(out)
} # End joint.prob.multi function

# Examples:
# Biallelic SNP locus, minor allele frequency = 0.2
n.allele <- 2
f.df <- as.data.frame(matrix(nr=1,nc=length(letters[1:n.allele]),c(0.2,0.8)))
colnames(f.df) <- letters[1:n.allele]
(joint.prob.multi(f.=f.df))

### Section 2: Example data simulation #####

#-----#
# Simulate diploid "SNP" type genotype data with potential allelic dropout and mistyping genotyping error.

# SNP.G.simulator() -- this function produces diploid multilocus genotypes from unrelated individuals
# under a specified set of allele frequencies and genotyping error rates. A list of objects is
# returned: the simulated genotypes with a leading column indexing a generic sampling id, and a last column
# indicating true individual id, followed by all other inputs passed back to the user.
# Arguments: F.sim.ls = a list object where each element is a 1 row matrix of
# allele frequencies and with column names indicating allele names (must be single-character strings, e.g.
# lower case letters or upper case letters) with one row for each locus simulated. Thus, the number of elements
# in the F.sim.ls sets the number of loci. See example below; ERR.locus = vector of per-allele
# generic genotyping error rates for biallelic SNP-type loci; n.unique = total number of unique individuals
# for which to simulate genotypes; id.start = integer at which unique individual id numbering commences;
# recap.ix = vector indicating which of 1:n.unique individuals is recaptured, which can include repeated
# captures of individuals (e.g. recap.ix = c(1,1,2,3)). If left as 'NA', no recaptures are simulated;
# r.seed = a random number seed. If left as 'NA', then no seed is passed.

SNP.G.simulator <- function(F.sim.ls,ERR.locus,n.unique,id.start,recap.ix=NA,r.seed=NA){
  # Set seed
  if(is.na(r.seed)==F){set.seed(r.seed)}
  # Translate locus-level error rate to per-allele rates (same for all loci here)
  err <- 1-sqrt(1-ERR.locus)
  # Calculate number recaptures
  if(length(recap.ix)==1 & sum(is.na(recap.ix))==1) {n.recap <- 0} else {n.recap <- length(recap.ix)}
  # Declare indexing variables
  n.loci <- length(F.sim.ls)
  col.even <- seq(from=2,to=2*n.loci,by=2)
  col.odd <- seq(from=1,to=2*n.loci,by=2)
  # Set up genotype storage object
  G.lat <- data.frame(matrix(nr=n.unique+n.recap,nc=2*n.loci))
  # True genotypes for n.unique individuals
  for(j in 1:n.loci){

```



```

    G.lat[1:n.unique,col.odd[j]] <- sample(colnames(F.sim.ls[[j]]),size=n.unique,prob=F.sim.ls[[j]],replace=T)
    G.lat[1:n.unique,col.even[j]] <- sample(colnames(F.sim.ls[[j]]),size=n.unique,prob=F.sim.ls[[j]],replace=T)
  } # end j loop over loci
# Simulate recaptured samples and populate sample and true identifications
if(n.recap>0) {G.lat[(n.unique+1):(n.unique+n.recap),] <- G.lat[recap.ix,]}
# Generate observed genotypes, following generic biallelic SNP genotyping error model (see Supplementary Text 1).
G.obs <- G.lat
for(j in 1:n.loci){
  # first allele copy for locus j, across all rows of G matrix
  temp.err <- rbinom(n=nrow(G.lat),size=1,prob=err[j])
  G.obs[temp.err==1,col.odd[j]] <- sapply(G.obs[temp.err==1,col.odd[j]],FUN=function(x){
    sample(colnames(F.sim.ls[[j]])[colnames(F.sim.ls[[j]])!=x],size=1,prob=F.sim.ls[[j]][colnames(F.sim.ls[[j]])!=x],
    replace=T)})
  # second allele copy for locus j, across all rows of G matrix
  temp.err <- rbinom(n=nrow(G.lat),size=1,prob=err[j])
  G.obs[temp.err==1,col.even[j]] <- sapply(G.obs[temp.err==1,col.even[j]],FUN=function(x){
    sample(colnames(F.sim.ls[[j]])[colnames(F.sim.ls[[j]])!=x],size=1,prob=F.sim.ls[[j]][colnames(F.sim.ls[[j]])!=x],
    replace=T)})
} # end j loop over loci for genotyping error
# Add in columns for sample vs. true identification
if(n.recap>0){G.obs <- cbind(id.start:(id.start-1 + n.unique + n.recap),G.obs,
  c(id.start:(id.start-1+n.unique),(id.start:(id.start-1 + n.unique))[recap.ix])} else
{G.obs <- cbind(id.start:(id.start-1 + n.unique),G.obs,id.start:(id.start-1 + n.unique))}
colnames(G.obs)[c(1,ncol(G.obs))] <- c("Sample.ID","True.ID")
return(structure(list(G.obs,F.sim.ls,ERR.locus,n.unique,recap.ix,r.seed),
  .Names=c("G.obs","F.sim.ls","ERR.locus","n.unique","recap.ix","r.seed")))
} # end function SNP.G.simulator()

# Examples:
# Generate an example data set for stage-1 clustering with which to identify within-sampling occasion recaptures.
# 64 biallelic "SNP" loci each 0.3 minor allele frequency, a 2% generic per locus genotyping error rate.
# Generate multilocus genotypes for 15 unique unrelated individuals, a double recapture of individual 1,
# and single recaptures of individuals 2-4.
# Simulation parameters:
num.loci=64; maf=0.3; allele.names=letters[1:2]
F.ls <- lapply(1:num.loci,FUN=function(j){
  x <- t(as.matrix(c(maf,1-maf)));
  colnames(x) <- allele.names;
  return(x)})
Ss1.sim <- SNP.G.simulator(F.sim.ls=F.ls, ERR.locus = rep(0.02,num.loci), n.unique = 15,
  id.start=100,recap.ix = c(1,1,2,3,4),r.seed = 1)

# Generate a pair of genotype data sets for testing of stage-2 sample clustering to identify between-sampling occasion
# recaptures. Set 1, as above but made up of 20 unique individuals. Set 2 made up of 5 recaptures from Set 1, and
# 15 unique unrelated individuals.
Ss2_1.sim <- SNP.G.simulator(F.sim.ls=F.ls, ERR.locus = rep(0.02,num.loci), n.unique = 20,
  id.start=100,recap.ix = NA,r.seed = 2)
Ss2_2.sim <- SNP.G.simulator(F.sim.ls=F.ls, ERR.locus = rep(0.02,num.loci), n.unique = 15,
  id.start=200,recap.ix = NA,r.seed = 3)
Ss2_2.sim$G.obs <- rbind(Ss2_2.sim$G.obs,Ss2_1.sim$G.obs[1:5,]) # create recaptures in sampling occasion 2
# repopulate a generic sample ID number for occasion 2
Ss2_2.sim$G.obs$Sample.ID <- Ss2_2.sim$G.obs$Sample.ID[1:(Ss2_2.sim$G.obs$Sample.ID[1] + nrow(Ss2_2.sim$G.obs)-1)

### Section 3: Stage-one clustering to identify repeated captures within a single sampling occasion #####
#-----#
# Inputs
# Get genotype data from a single capture occasion.

```

```

# NOTE: Input genotype data need have in column 1 a sample ID, followed by a column for
# each allele copy for each diploid locus. Allele calls need be single character strings.
# See example output from SNP.G.simulator() for input genotype formatting examples.
S.input <- Ssl.sim$G.obs[,1:(ncol(Ssl.sim$G.obs)-1)] # Don't need the true individual ID column
# Get allele frequency matrix. Format: a list object where each element is a 1 row matrix of allele
# frequencies and with column names indicating allele names with one row for each locus simulated. Thus,
# the number of elements in the F.sim.ls sets the number of loci.
F.m <- Ssl.sim$F.sim.ls # F.sim.m
# Declare vectors of locus-level error rates
err.l <- Ssl.sim$ERR.locus

#-----#
# Initialize intermediate quantities and storage objects
# Get number of alleles at each locus
n.allele <- sapply(F.m,FUN=function(x){length(x)})
# Get number of loci
n.loci <- length(F.m)
# Convert locus-level error rates to per-allele rates
err <- 1-sqrt(1-err.l)
# Given the input allele frequencies, define joint probabilities given different relationship states,
# using the joint.prob.multi() user defined function. Can take time to generate if many alleles at loci.
# The idea is to calculate this once, and then reference relevant genotype pairs during the clustering
# loop later.
joint.prob.ls <- list()
for(L in 1:length(F.m)){
  joint.prob.ls[[L]] <- joint.prob.multi(f.=F.m[[L]])
}
# Column indexing vector--be careful here, this relies on specific format of input genotypes (see above).
col.even <- seq(from=2,to=ncol(S.input)-1,by=2)
col.odd <- seq(from=3,to=ncol(S.input),by=2)
# Initialize storage variables if possible outside of loops below, helper functions
n.prob.ls <- 9 # 9 possible pairs of diploid genotypes with biallelic markers
# Storage vector, defined relevant to number of alleles at locus j
Pg1_k1 <- rep(1,n.prob.ls)
Pg2_k2 <- Pg1_k1
# Storage vectors for discrepancies between pairs of genotypes
dg1_k1 <- rep(0,n.prob.ls)
dg2_k2 <- dg1_k1
# Helper function
`%notin%` <- Negate(`%in%`)
# Storage matrix for L(observed genotypes in pair of sets | relationship) at each locus, j.
# A matrix of dimension rows = # loci, cols = 4 (in order, SI, U, PO, FS)
LRG1G2j <- matrix(nr=n.loci,nc=4,1)
colnames(LRG1G2j) <- c("SI","U","PO","FS") # assign colnames to object for record keeping/debugging
# Storage for Likelihood product across all (assumed independent) loci
LRG1G2 <- 1:4 # L| SI, U, PO, FS

#-----#
# Stage-one clustering in action. This code contains several error traps; see code comments below.
# Step 1: Initialize the clustering algorithm with all samples as singleton sets, a list object with sample IDs.
S <- list()
for(z in 1:nrow(S.input)){S[[z]] <- S.input[z,1]} # sample ID taken from first column
S.old <- S # temporary copy
# Steps 2-3: Pairwise comparisons for match calls, repeating until set membership stops changing
repeat{
  S.old <- S
  for(i in 1:length(S)){

```

```

# Likelihood ratio and set membership sample ID labels placeholders; need list objects here s.t.
# a given element can hold more than one multilocus genotype if need be.
temp.rat.sc <- list()
temp.rat.mr <- list()
# Indexing variable place holder
ixl <- 0
# Exit trap, don't make a match comparison if S[[i]] set is NA, i.e. G1 is empty set
if(sum(is.na(S[[i]]))>0) {next}
# Indexing construct for i and k>i results in all unique pairwise comparisons across sets
for(k in (1:length(S))[(1:length(S))>i]){
  # Get the pair of sets of genotypes to compare
  G1 <- S.input[S.input[,1]%in%S[[i]],]
  G2 <- S.input[S.input[,1]%in%S[[k]],]
  # Exit trap, if G2 is empty set proceed to next k
  if(nrow(G2)==0) {next}
  # Determine which are common positive PCR loci, i.e. the set of loci for which both samples
  # have any genotype call. Note, the below code still works when a given G1 or G2 set has multiple
  # elements.
  pos.loci.ix <- col.even[(nrow(G1)-colSums(is.na(G1[col.even])))>0 &
    (nrow(G2)-colSums(is.na(G2[col.even])))>0]/2
  # Update indexing variable
  ixl <- ixl+1
  # Exit trap, if pos.loci.ix is zero, implying no common loci with genotypes which can happen with real-world
  # data with failed PCR outcomes across some loci. One could impose a common-loci minimum threshold here
  # as well. Note, exit in this case results in retaining separation of the two compared sample sets, implying
  # they derive from separate individuals.
  if(length(pos.loci.ix)==0) {
    # store index information for compared sets, and evidence ratio
    temp.rat.sc[[ixl]] <- G2[,1]
    temp.rat.mr[[ixl]] <- 0 # force to zero
    next
  } # end if
# Make calculations for likelihood across loci, Lj(R(1,2)), for each locus
for(j in 1:n.loci){
  # First, determine whether there is missing genotype info among the two compared sets at this locus,
  # using pos.loci.ix from above. If yes, pass a 1.0 value which will not affect likelihood
  # multiplication subsequently (i.e. Like * 1 = Like).
  if(j %notin% pos.loci.ix){
    LRG1G2j[j,1:4] <- rep(1,4)
    next} # end if; 'next' goes to next locus
# Reference the set of possible pairs of genotypes at a given locus and associated joint probabilities
# calculated with joint.prob.multi() outside the clustering algorithm, Pr(kj1,kj2|R),
temp.prob <- joint.prob.ls[[j]]
# Calculate the probability of observed genotypes given proposed latent genotypes, Pr(gj|kj).
# This code accomodates multiple genotypes within a set, e.g. if after an
# iteration of the clustering algorithm, it is found that two samples from a single individual are
# grouped into one set.
# Reset storage vector for probabilities of pairs of genotypes to 1.0
Pg1_k1[] <- rep(1,n.prob.ls)
Pg2_k2[] <- rep(1,n.prob.ls)
# Reset storage vectors for discrepancies between pairs of genotypes to zero
dg1_k1[] <- rep(0,n.prob.ls)
dg2_k2[] <- rep(0,n.prob.ls)
for(ii in 1:nrow(G1)){
  # First, determine whether there is a missing locus; if yes, then exit
  if(sum(is.na(G1[ii,(col.even[j]:col.odd[j])]))>0){next}
  # Else compute number of discrepant alleles between all g1 in G1 and k1's. This code

```

```

# sorts alleles so that all heterozygotes have the same form, e.g. "ba" sorted to "ab".
# This is necessary to correctly reference latent genotypes from the joint.prob.ls object.
  dg1_k1[1:n.prob.ls] <- dg1_k1[1:n.prob.ls] +
    adist(paste0(sort(G1[ii,(col.odd[j]:col.even[j]])),collapse=""),temp.prob$k1)
}
for(ii in 1:nrow(G2)){
  if(sum(is.na(G2[ii,(col.even[j]:col.odd[j]])))>0){next}
  dg2_k2[1:n.prob.ls] <- dg2_k2[1:n.prob.ls] +
    adist(paste0(sort(G2[ii,(col.odd[j]:col.even[j]])),collapse=""),temp.prob$k2)
}
# With biallelic SNP error model, calculate Pr(gj|kj)
  Pg1_k1[1:9] <- sapply(dg1_k1,FUN=function(x){P.error.snp(gamma_j=err[j],n.a=2*nrow(G1),d_gk=x)})
  Pg2_k2[1:9] <- sapply(dg2_k2,FUN=function(x){P.error.snp(gamma_j=err[j],n.a=2*nrow(G2),d_gk=x)})
# Crossproducts to sum over all combinations of Pr(k1k2|R) * Pr(g1|k1) * Pr(g2|k2) at this locus
LRG1G2j[j,1] <- as.numeric(temp.prob$prob.SI) %*% (Pg1_k1*Pg2_k2)
LRG1G2j[j,2] <- as.numeric(temp.prob$prob.U) %*% (Pg1_k1*Pg2_k2)
LRG1G2j[j,3] <- as.numeric(temp.prob$prob.PO) %*% (Pg1_k1*Pg2_k2)
LRG1G2j[j,4] <- as.numeric(temp.prob$prob.FS) %*% (Pg1_k1*Pg2_k2)
} # end j loop over loci
# Now product across loci, L(R_(1,2))
LRG1G2 <- apply(LRG1G2j,MARGIN=2,FUN=prod)
# Store index information for compared sets, and likelihood ratios of L(R_(1,2)=SI)/L(R_(1,2)=other).
# See Wang(2004,2006,2016), Kalinowski et al. (2006), and Supplement 1 to this article for details
# on the sample matching likelihood ratio model.
temp.rat.sc[[ix1]] <- G2[,1]
temp.rat.mr[[ix1]] <- LRG1G2[1]/max(LRG1G2[2:4],na.rm=T)
} # end k loop over all samples > i (pairwise combos)
# Update set membership by combining G2 into G1 if max likelihood ratio > 1.0
if(length(temp.rat.mr)>0){
  # As written here, temp.Sample.Code can be multiple different sets if more than one
  # set produces a max evidence ratio
  temp.rat.mr.v <- unlist(temp.rat.mr)
  temp.Sample.Code <-
    unlist(temp.rat.sc[temp.rat.mr.v==max(temp.rat.mr.v,na.rm=T) & temp.rat.mr.v>1.0])
  } else {temp.Sample.Code <- NULL}
  S[[i]] <- c(S[[i]],temp.Sample.Code)
# Now remove the sample codes from the singleton sets such that it isn't considered for
# allocation again later
  if(length(temp.Sample.Code)>0){
    S[unlist( lapply(S,FUN=function(x){sum(x%in%temp.Sample.Code)==length(x)}) )] <- NA
  } # end if
} # end i loop
S <- lapply(S, function(x) x[!is.na(x)]) # Cleaning up
S <- S[lapply(S,length)>0] # Cleaning up
if(identical(S,S.old)==TRUE){break}
} # End repeat when no new updating, step 4.

# Convert the final S list to a matrix object to examine clustering
S.m <- matrix(nr=length(S),nc=max(unlist(lapply(S,FUN=length))),NA )
for(r in 1:nrow(S.m)){
  S.m[r,1:length(S[[r]])] <- S[[r]]
} # end r loop
# print
S.m # Unique individuals along rows, any corresponding recaptures' Sample IDs in column 2+
Ssl.sim$G.obs[,c("Sample.ID","True.ID")] # Cross reference Sample IDs to verify recapture identity

### Section 4: Stage two clustering to identify recaptures across sampling occasions #####

```

```

#-----#
# Inputs
# Get genotype data from a pair of capture occasions.
# NOTE: Input genotype data need have in column 1 a sample ID, followed by a column for
# each allele copy for each diploid locus. Allele calls need be single character strings.
# See example output from SNP.G.simulator() for input genotype formatting examples.
S1.input <- Ss2_1.sim$G.obs[,1:(ncol(Ss2_1.sim$G.obs)-1)] # Don't need the true individual ID column
S2.input <- Ss2_2.sim$G.obs[,1:(ncol(Ss2_2.sim$G.obs)-1)] # Don't need the true individual ID column
# Get allele frequency matrix. Format: a list object where each element is a 1 row matrix of allele
# frequencies and with column names indicating allele names with one row for each locus simulated. Thus,
# the number of elements in the F.sim.ls sets the number of loci.
F.m <- Ss1.sim$F.sim.ls # F.sim.m
# Declare vectors of locus-level error rates
err.l <- Ss1.sim$ERR.locus

#-----#
# Initialize intermediate quantities and storage objects
# Get number of alleles at each locus
n.allele <- sapply(F.m,FUN=function(x){length(x)})
# Get number of loci
n.loci <- length(F.m)
# Convert locus-level error rates to per-allele rates
err <- 1-sqrt(1-err.l)
# Given the input allele frequencies, define joint probabilities given different relationship states,
# using the joint.prob.multi() user defined function. Can take time to generate if many alleles at loci.
# The idea is to calculate this once, and then reference relevant genotype pairs during the clustering
# loop later.
joint.prob.ls <- list()
for(L in 1:length(F.m)){
  joint.prob.ls[[L]] <- joint.prob.multi(f.=F.m[[L]])
}
# Column indexing vector--be careful here, this relies on specific format of input genotypes (see above).
col.even <- seq(from=2,to=ncol(S.input)-1,by=2)
col.odd <- seq(from=3,to=ncol(S.input),by=2)
# Initialize storage variables if possible outside of loops below, helper functions
n.prob.ls <- 9 # 9 possible pairs of diploid genotypes with biallelic markers
# Storage vector, defined relevant to number of alleles at locus j
Pg1_k1 <- rep(1,n.prob.ls)
Pg2_k2 <- Pg1_k1
# Storage vectors for discrepancies between pairs of genotypes
dgl_k1 <- rep(0,n.prob.ls)
dg2_k2 <- dgl_k1
# Helper function
`%notin%` <- Negate(`%in%`)
# Storage matrix for L(observed genotypes in pair of sets | relationship) at each locus, j.
# A matrix of dimension rows = # loci, cols = 4 (in order, SI, U, PO, FS)
LRG1G2j <- matrix(nr=n.loci,nc=4,1)
colnames(LRG1G2j) <- c("SI","U","PO","FS") # assign colnames to object for record keeping/debugging
# Storage for Likelihood product across all (assumed independent) loci
LRG1G2 <- 1:4 # L| SI, U, PO, FSS

#-----#
# Stage-two clustering in action. This code contains several error traps; see code comments below.
# Intialize the clustering algorithm with all samples as singleton sets, list objects with sample IDs.
S1 <- list()
S2 <- list()
for(z in 1:nrow(S1.input)){S1[[z]] <- S1.input[z,1]} # sample ID is in first column

```

```

for(z in 1:nrow(S2.input)){S2[[z]] <- S2.input[z,1]}
# Steps 1-2: Pairwise comparisons for match calls
for(i in 1:length(S1)){
  # Likelihood ratio and set membership sample ID labels placeholders; need list objects here s.t.
  # a given element can hold more than one multilocus genotype if need be.
  temp.rat.sc <- list()
  temp.rat.mr <- list()
  # Indexing variable place holder
  ix1 <- 0
  # Exit trap, don't make a match comparison if S1[[i]] set is NA, i.e. G1 is empty set
  if(sum(is.na(S1[[i]]))>0) {next}
  # Indexing across sampling occasions, compare each ith sample in S1 to all samples in S2 for recaptures
  for(k in 1:length(S2)){
    # Get the pair of sets of genotypes to compare
    G1 <- S1.input[S1.input[,1]%in%S1[[i]],]
    G2 <- S2.input[S2.input[,1]%in%S2[[k]],]
    # Exit trap, if G2 is empty set proceed to next k
    if(nrow(G2)==0) {next}
    # Determine which are common positive PCR loci, i.e. the set of loci for which both samples
    # have any genotype call. Note, the below code still works when a given G1 or G2 set has multiple
    # elements
    pos.loci.ix <- col.even[(nrow(G1)-colSums(is.na(G1[col.even])))>0 &
      (nrow(G2)-colSums(is.na(G2[col.even])))>0]/2
    # Update indexing variable
    ix1 <- ix1+1
    # Exit trap, if pos.loci.ix is zero, implying no common loci with genotypes which can happen with real-world
    # data with failed PCR outcomes across some loci. One could impose a common-loci minimum threshold here
    # as well. Note, exit in this case results in retaining separation of the two compared sample sets, implying
    # they derive from separate individuals.
    if(length(pos.loci.ix)==0) {
      # store index information for compared sets, and evidence ratio
      temp.rat.sc[[ix1]] <- G2[,1]
      temp.rat.mr[[ix1]] <- 0 # force to zero
      next
    } # end if
  } # end for
  # Make calculations for likelihood across loci, Lj(R_(1,2)), for each locus
  for(j in 1:n.loci){
    # First, determine whether there is missing genotype info among the two compared sets at this locus,
    # using pos.loci.ix from above. If yes, pass a 1.0 value which will not affect likelihood
    # multiplication subsequently (i.e. Like * 1 = Like).
    if(j %notin% pos.loci.ix){
      LRG1G2j[j,1:4] <- rep(1,4)
      next} # end if; 'next' goes to next locus
    # Reference the set of possible pairs of genotypes at a given locus and associated joint probabilities
    # calculated with joint.prob.multi() outside the clustering algorithm, Pr(kj1,kj2|R),
    temp.prob <- joint.prob.ls[[j]]
    # Calculate the probability of observed genotypes given proposed latent genotypes, Pr(gj|kj).
    # This code accommodates multiple genotypes within a set, e.g. if after an
    # iteration of the clustering algorithm, it is found that two samples from a single individual are
    # grouped into one set.
    # Reset storage vector for probabilities of pairs of genotypes to 1.0
    Pg1_k1[] <- rep(1,n.prob.ls)
    Pg2_k2[] <- rep(1,n.prob.ls)
    # Reset storage vectors for discrepancies between pairs of genotypes to zero
    dg1_k1[] <- rep(0,n.prob.ls)
    dg2_k2[] <- rep(0,n.prob.ls)
    for(ii in 1:nrow(G1)){

```

```

# First, determine whether there is a missing locus; if yes, then exit
if(sum(is.na(G1[ii,(col.even[j]:col.odd[j])]))>0){next}
# Else compute number of discrepant alleles between all g1 in G1 and k1's. This code
# sorts alleles so that all heterozygotes have the same form, e.g. "ba" sorted to "ab".
# This is necessary to correctly reference latent genotypes from the joint.prob.ls object.
dgl_k1[1:n.prob.ls] <- dgl_k1[1:n.prob.ls] +
  adist(paste0(sort(G1[ii,(col.odd[j]:col.even[j])]),collapse=""),temp.prob$k1)
}
for(ii in 1:nrow(G2)){
  if(sum(is.na(G2[ii,(col.even[j]:col.odd[j])]))>0){next}
  dg2_k2[1:n.prob.ls] <- dg2_k2[1:n.prob.ls] +
    adist(paste0(sort(G2[ii,(col.odd[j]:col.even[j])]),collapse=""),temp.prob$k2)
}
# With biallelic SNP error model, calculate Pr(gj|kj)
Pg1_k1[1:9] <- sapply(dgl_k1,FUN=function(x){P.error.snp(gamma_j=err[j],n.a=2*nrow(G1),d_gk=x)})
Pg2_k2[1:9] <- sapply(dg2_k2,FUN=function(x){P.error.snp(gamma_j=err[j],n.a=2*nrow(G2),d_gk=x)})
# Crossproducts to sum over all combinations of Pr(k1k2|R) * Pr(g1|k1) * Pr(g2|k2) at this locus
LRG1G2j[j,1] <- as.numeric(temp.prob$prob.SI) %**% (Pg1_k1*Pg2_k2)
LRG1G2j[j,2] <- as.numeric(temp.prob$prob.U) %**% (Pg1_k1*Pg2_k2)
LRG1G2j[j,3] <- as.numeric(temp.prob$prob.PO) %**% (Pg1_k1*Pg2_k2)
LRG1G2j[j,4] <- as.numeric(temp.prob$prob.FS) %**% (Pg1_k1*Pg2_k2)
} # end j loop over loci
# Now product across loci, L(R_(1,2))
LRG1G2 <- apply(LRG1G2j,MARGIN=2,FUN=prod)
# Store index information for compared sets, and likelihood ratios of L(R_(1,2)=SI)/L(R_(1,2)=other).
# See Wang(2004,2006,2016), Kalinowski et al. (2006), and Supplement 1 to this article for details
# on the sample matching likelihood ratio model.
temp.rat.sc[[ix1]] <- G2[,1]
temp.rat.mr[[ix1]] <- LRG1G2[1]/max(LRG1G2[2:4],na.rm=T)
} # end k loop over all samples > i (pairwise combos)
# Update set membership by combining G2 into G1 if max likelihood ratio > 1.0
if(length(temp.rat.mr)>0){
  # As written here, temp.Sample.Code can be multiple different sets if more than one
  # set produces a max evidence ratio
  temp.rat.mr.v <- unlist(temp.rat.mr)
  temp.Sample.Code <-
    unlist(temp.rat.sc[temp.rat.mr.v==max(temp.rat.mr.v,na.rm=T) & temp.rat.mr.v>1.0])
} else {temp.Sample.Code <- NULL}
S1[[i]] <- c(S1[[i]],temp.Sample.Code)
# Now remove the sample codes from the singleton sets in S2 such that it isn't considered for
# allocation again later
if(length(temp.Sample.Code)>0){
  S2[unlist( lapply(S2,FUN=function(x){sum(x%in%temp.Sample.Code)==length(x)}) ) ] <- NA
} # end if
} # end i loop
S2 <- lapply(S2, function(x) x[!is.na(x)]) # Cleaning up
S2 <- S2[lapply(S2,length)>0] # Cleaning up

# Convert the final S1 list to a matrix object to examine clustering. Those rows (sets) with > 2 members
# indicate the sample IDs captured in both occasion one and occasion
S.m <- matrix(nr=length(S1),nc=max(unlist(lapply(S1,FUN=length))),NA )
for(r in 1:nrow(S.m)){
  S.m[r,1:length(S1[[r]])] <- S1[[r]]
} # end r loop
# print
S.m # Sample IDs from Set 1 in column 1 and any corresponding recaptures' Sample IDs in column 2
Ss2_2.sim$G.obs[,c("Sample.ID","True.ID")] # Cross reference Sample IDs to verify recapture identity

```

```
### Section 5: References #####
# Kalinowski ST, Taper ML, Creel S. 2006 Using DNA from non-invasive
# samples to identify individuals and census populations: an evidential
# approach tolerant of genotyping errors. Conserv. Genet. 7, 319-329.
# Wang J. 2004 Sibship reconstruction from genetic data with typing errors.
# Genetics 166, 1963-1979.
# Wang J. 2006 Informativeness of genetic markers for pairwise relationship
# and relatedness inference. Theor. Popul. Biol. 70, 300-321.
# Wang J. 2016 Individual identification from genetic marker data: developments
# and accuracy comparisons of methods. Mol. Ecol. Resour. 16, 163-175.
# Weir B, Anderson AD, Hepler AB. 2006 Genetic relatedness analysis: modern
# data and new challenges. Nat. Rev. Genet. 7, 771-780.
```



#### Supplement 4: Case study genetic marker characteristics

Table S4.1 Allele frequencies and genotyping error rates for a sample of Pacific Walrus case study data.

| Locus         | Minor allele frequency | Total repeated amplifications | Genotyping error rate |
|---------------|------------------------|-------------------------------|-----------------------|
| R022436_F     | 0.493                  | 209                           | 0.002                 |
| Oro_29_19932  | 0.487                  | 133                           | 0.004                 |
| Oro_26_19246  | 0.482                  | 151                           | 0.003                 |
| R085783_F     | 0.481                  | 210                           | 0.000                 |
| R071991_F     | 0.479                  | 214                           | 0.000                 |
| R095477_R     | 0.478                  | 211                           | 0.000                 |
| R057919_F     | 0.474                  | 211                           | 0.002                 |
| R041755_F     | 0.469                  | 213                           | 0.000                 |
| R063501_R     | 0.464                  | 209                           | 0.002                 |
| Oro_244_6146  | 0.464                  | 213                           | 0.000                 |
| R054658_F     | 0.460                  | 209                           | 0.007                 |
| R069960_F     | 0.460                  | 213                           | 0.000                 |
| Oro_209_4700  | 0.455                  | 214                           | 0.000                 |
| R003929_R     | 0.453                  | 212                           | 0.000                 |
| R110616_R     | 0.451                  | 212                           | 0.000                 |
| Oro_297_12481 | 0.449                  | 134                           | 0.004                 |
| Oro_17_7095   | 0.449                  | 144                           | 0.010                 |
| R074886_R     | 0.446                  | 213                           | 0.000                 |
| R030422_F     | 0.445                  | 132                           | 0.000                 |
| Oro_59_28272  | 0.445                  | 150                           | 0.007                 |
| R044524_F     | 0.441                  | 147                           | 0.007                 |
| Oro_91_81195  | 0.441                  | 134                           | 0.004                 |
| R036451_F     | 0.439                  | 150                           | 0.020                 |
| R076553_F     | 0.438                  | 214                           | 0.000                 |
| R003503_F     | 0.434                  | 209                           | 0.000                 |
| Oro_62_42699  | 0.431                  | 142                           | 0.035                 |
| R015125_F     | 0.428                  | 213                           | 0.000                 |
| R112147_F     | 0.424                  | 134                           | 0.004                 |
| R035683_R     | 0.424                  | 134                           | 0.007                 |
| R050977_R     | 0.423                  | 212                           | 0.002                 |
| R082930_F     | 0.420                  | 134                           | 0.000                 |
| R009365_F     | 0.418                  | 213                           | 0.000                 |
| Oro_200_64743 | 0.417                  | 134                           | 0.004                 |
| R000414_R     | 0.409                  | 152                           | 0.020                 |
| Oro_260_4294  | 0.408                  | 134                           | 0.004                 |
| R045452_R     | 0.400                  | 212                           | 0.005                 |
| R113465_F     | 0.398                  | 214                           | 0.000                 |
| R093661_R     | 0.395                  | 212                           | 0.000                 |
| R016631_R     | 0.389                  | 211                           | 0.002                 |
| R003141_F     | 0.385                  | 136                           | 0.022                 |
| R010659_R     | 0.378                  | 132                           | 0.004                 |
| R007106_F     | 0.376                  | 129                           | 0.051                 |
| R109577_F     | 0.373                  | 152                           | 0.007                 |
| R127210_F     | 0.369                  | 134                           | 0.004                 |
| R024627_R     | 0.368                  | 212                           | 0.000                 |
| Oro_39_28704  | 0.366                  | 152                           | 0.010                 |

|                           |       |     |       |
|---------------------------|-------|-----|-------|
| R072907_F                 | 0.363 | 134 | 0.000 |
| R053490_F                 | 0.359 | 134 | 0.004 |
| R026226_F                 | 0.355 | 142 | 0.004 |
| R097533_R                 | 0.353 | 209 | 0.000 |
| Oro_82_103979             | 0.352 | 137 | 0.036 |
| R006728_R                 | 0.352 | 134 | 0.004 |
| R026061_R                 | 0.352 | 134 | 0.000 |
| R022808_R                 | 0.346 | 209 | 0.000 |
| R098501_F                 | 0.340 | 209 | 0.000 |
| R026855_F                 | 0.333 | 213 | 0.000 |
| R013534_F                 | 0.329 | 213 | 0.000 |
| R119762_R                 | 0.329 | 134 | 0.004 |
| R032094_F                 | 0.325 | 213 | 0.000 |
| R072666_R                 | 0.319 | 152 | 0.007 |
| R008033_F                 | 0.313 | 212 | 0.000 |
| Oro_133_7746              | 0.243 | 212 | 0.000 |
| R083252_FXY               | 0.124 | 150 | 0.003 |
| Oro_18_45046 <sup>d</sup> | 0.000 | 65  | 0.000 |

<sup>a</sup>Data are from the U.S. Fish and Wildlife Service and represent pilot data ( $n=3824$ ) for two sampling occasions, one in summer 2013 and one in summer 2014 in the Chuchki and Bering Sea, Alaska, U.S.A. Samples were genotyped using Applied Biosystems Custom TaqMan® SNP Genotyping Assays on the QuantStudio™ 12K Flex. Any use of trade, firm, or product names is for descriptive purposes only and does not imply endorsement by the U.S. Government.

<sup>b</sup>Total number of repeated amplifications of genotypes used to assess per-locus genotyping error rates.

<sup>c</sup>Per-locus error rate.

<sup>d</sup>This locus exhibited a single allele and was subsequently purged from matching analysis.

Table S4.2 Allele frequencies and genotyping error rates for a sample of Fisher case study data.

| Locus   | Number of alleles | Allele frequencies                                       | Total 3x replicates | Allelic d |
|---------|-------------------|----------------------------------------------------------|---------------------|-----------|
| Lut604  | 6                 | {0.3144,0.2776,0.1839,0.087,0.0786,0.0585}               | 280                 | 0.        |
| Mal     | 8                 | {0.3428,0.3294,0.2592,0.0435,0.0151,0.005,0.0033,0.0017} | 275                 | 0.        |
| MP0055  | 5                 | {0.5567,0.3233,0.0883,0.0267,0.005}                      | 281                 | 0.        |
| MP0182  | 6                 | {0.43,0.2667,0.245,0.0467,0.01,0.0017}                   | 278                 | 0.        |
| Mvis072 | 6                 | {0.5035,0.2944,0.1063,0.0697,0.0192,0.007}               | 258                 | 0.        |
| RIO20   | 6                 | {0.3435,0.2058,0.2041,0.1854,0.0357,0.0255}              | 263                 | 0.        |
| Ggu101  | 6                 | {0.6132,0.1807,0.1622,0.0304,0.0118,0.0017}              | 277                 | 0.        |
| MP0100  | 5                 | {0.7299,0.1711,0.0906,0.0067,0.0017}                     | 279                 | 0.        |
| MP0084  | 7                 | {0.3688,0.299,0.1993,0.1213,0.005,0.005,0.0017}          | 280                 | 0.        |

<sup>a</sup>Data are from the New York Cooperative Fish and Wildlife Research Unit Cornell University, and represent data ( $n = 200$ ) for two week-long sampling occasions at 608 hair snare traps during the winter of 2014 in the state of New York, U.S.A. A total of 302 samples retained in the final study at large were used to calculate allele frequencies; a subset of 281 samples were used to assess genotyping error rates.

<sup>b</sup>Total number of samples repeat amplified three times and used to assess per-locus genotyping error rates.

<sup>c</sup>Per-locus error rate, assessed at the level of a replicate.

## Supplement 5: Detailed base case simulation results

Table S5.1 SNP base case simulation results<sup>a</sup>.

| Relationship state | Number of loci | MAF | Error rate | Match call rate |
|--------------------|----------------|-----|------------|-----------------|
| FS                 | 32             | 0.2 | 0.00       | 0.0001          |
| FS                 | 48             | 0.2 | 0.00       | 0.0000          |
| FS                 | 64             | 0.2 | 0.00       | 0.0000          |
| FS                 | 80             | 0.2 | 0.00       | 0.0000          |
| FS                 | 96             | 0.2 | 0.00       | 0.0000          |
| FS                 | 128            | 0.2 | 0.00       | 0.0000          |
| FS                 | 32             | 0.2 | 0.01       | 0.0038          |
| FS                 | 48             | 0.2 | 0.01       | 0.0006          |
| FS                 | 64             | 0.2 | 0.01       | 0.0000          |
| FS                 | 80             | 0.2 | 0.01       | 0.0000          |
| FS                 | 96             | 0.2 | 0.01       | 0.0000          |
| FS                 | 128            | 0.2 | 0.01       | 0.0000          |
| FS                 | 32             | 0.2 | 0.02       | 0.0061          |
| FS                 | 48             | 0.2 | 0.02       | 0.0007          |
| FS                 | 64             | 0.2 | 0.02       | 0.0003          |
| FS                 | 80             | 0.2 | 0.02       | 0.0001          |
| FS                 | 96             | 0.2 | 0.02       | 0.0000          |
| FS                 | 128            | 0.2 | 0.02       | 0.0000          |
| FS                 | 32             | 0.2 | 0.05       | 0.0167          |
| FS                 | 48             | 0.2 | 0.05       | 0.0043          |
| FS                 | 64             | 0.2 | 0.05       | 0.0011          |
| FS                 | 80             | 0.2 | 0.05       | 0.0003          |
| FS                 | 96             | 0.2 | 0.05       | 0.0001          |
| FS                 | 128            | 0.2 | 0.05       | 0.0000          |
| FS                 | 32             | 0.2 | 0.10       | 0.0334          |
| FS                 | 48             | 0.2 | 0.10       | 0.0136          |
| FS                 | 64             | 0.2 | 0.10       | 0.0037          |
| FS                 | 80             | 0.2 | 0.10       | 0.0016          |
| FS                 | 96             | 0.2 | 0.10       | 0.0010          |
| FS                 | 128            | 0.2 | 0.10       | 0.0001          |
| FS                 | 32             | 0.2 | 0.25       | 0.1254          |
| FS                 | 48             | 0.2 | 0.25       | 0.0791          |
| FS                 | 64             | 0.2 | 0.25       | 0.0523          |
| FS                 | 80             | 0.2 | 0.25       | 0.0335          |
| FS                 | 96             | 0.2 | 0.25       | 0.0221          |
| FS                 | 128            | 0.2 | 0.25       | 0.0104          |
| FS                 | 32             | 0.3 | 0.00       | 0.0000          |
| FS                 | 48             | 0.3 | 0.00       | 0.0000          |
| FS                 | 64             | 0.3 | 0.00       | 0.0000          |
| FS                 | 80             | 0.3 | 0.00       | 0.0000          |
| FS                 | 96             | 0.3 | 0.00       | 0.0000          |
| FS                 | 128            | 0.3 | 0.00       | 0.0000          |
| FS                 | 32             | 0.3 | 0.01       | 0.0009          |
| FS                 | 48             | 0.3 | 0.01       | 0.0001          |
| FS                 | 64             | 0.3 | 0.01       | 0.0000          |
| FS                 | 80             | 0.3 | 0.01       | 0.0000          |
| FS                 | 96             | 0.3 | 0.01       | 0.0000          |
| FS                 | 128            | 0.3 | 0.01       | 0.0000          |
| FS                 | 32             | 0.3 | 0.02       | 0.0021          |
| FS                 | 48             | 0.3 | 0.02       | 0.0002          |

|    |     |     |      |        |
|----|-----|-----|------|--------|
| FS | 64  | 0.3 | 0.02 | 0.0000 |
| FS | 80  | 0.3 | 0.02 | 0.0000 |
| FS | 96  | 0.3 | 0.02 | 0.0000 |
| FS | 128 | 0.3 | 0.02 | 0.0000 |
| FS | 32  | 0.3 | 0.05 | 0.0079 |
| FS | 48  | 0.3 | 0.05 | 0.0012 |
| FS | 64  | 0.3 | 0.05 | 0.0001 |
| FS | 80  | 0.3 | 0.05 | 0.0001 |
| FS | 96  | 0.3 | 0.05 | 0.0000 |
| FS | 128 | 0.3 | 0.05 | 0.0000 |
| FS | 32  | 0.3 | 0.10 | 0.0224 |
| FS | 48  | 0.3 | 0.10 | 0.0064 |
| FS | 64  | 0.3 | 0.10 | 0.0025 |
| FS | 80  | 0.3 | 0.10 | 0.0007 |
| FS | 96  | 0.3 | 0.10 | 0.0003 |
| FS | 128 | 0.3 | 0.10 | 0.0000 |
| FS | 32  | 0.3 | 0.25 | 0.1189 |
| FS | 48  | 0.3 | 0.25 | 0.0753 |
| FS | 64  | 0.3 | 0.25 | 0.0477 |
| FS | 80  | 0.3 | 0.25 | 0.0311 |
| FS | 96  | 0.3 | 0.25 | 0.0193 |
| FS | 128 | 0.3 | 0.25 | 0.0084 |
| FS | 32  | 0.4 | 0.00 | 0.0000 |
| FS | 48  | 0.4 | 0.00 | 0.0000 |
| FS | 64  | 0.4 | 0.00 | 0.0000 |
| FS | 80  | 0.4 | 0.00 | 0.0000 |
| FS | 96  | 0.4 | 0.00 | 0.0000 |
| FS | 128 | 0.4 | 0.00 | 0.0000 |
| FS | 32  | 0.4 | 0.01 | 0.0006 |
| FS | 48  | 0.4 | 0.01 | 0.0000 |
| FS | 64  | 0.4 | 0.01 | 0.0000 |
| FS | 80  | 0.4 | 0.01 | 0.0000 |
| FS | 96  | 0.4 | 0.01 | 0.0000 |
| FS | 128 | 0.4 | 0.01 | 0.0000 |
| FS | 32  | 0.4 | 0.02 | 0.0013 |
| FS | 48  | 0.4 | 0.02 | 0.0001 |
| FS | 64  | 0.4 | 0.02 | 0.0001 |
| FS | 80  | 0.4 | 0.02 | 0.0000 |
| FS | 96  | 0.4 | 0.02 | 0.0000 |
| FS | 128 | 0.4 | 0.02 | 0.0000 |
| FS | 32  | 0.4 | 0.05 | 0.0050 |
| FS | 48  | 0.4 | 0.05 | 0.0010 |
| FS | 64  | 0.4 | 0.05 | 0.0003 |
| FS | 80  | 0.4 | 0.05 | 0.0001 |
| FS | 96  | 0.4 | 0.05 | 0.0001 |
| FS | 128 | 0.4 | 0.05 | 0.0000 |
| FS | 32  | 0.4 | 0.10 | 0.0185 |
| FS | 48  | 0.4 | 0.10 | 0.0057 |
| FS | 64  | 0.4 | 0.10 | 0.0016 |
| FS | 80  | 0.4 | 0.10 | 0.0004 |
| FS | 96  | 0.4 | 0.10 | 0.0001 |
| FS | 128 | 0.4 | 0.10 | 0.0000 |
| FS | 32  | 0.4 | 0.25 | 0.1158 |
| FS | 48  | 0.4 | 0.25 | 0.0790 |
| FS | 64  | 0.4 | 0.25 | 0.0480 |
| FS | 80  | 0.4 | 0.25 | 0.0294 |

|    |     |     |      |        |
|----|-----|-----|------|--------|
| FS | 96  | 0.4 | 0.25 | 0.0204 |
| FS | 128 | 0.4 | 0.25 | 0.0101 |
| SI | 32  | 0.2 | 0.00 | 1.0000 |
| SI | 48  | 0.2 | 0.00 | 1.0000 |
| SI | 64  | 0.2 | 0.00 | 1.0000 |
| SI | 80  | 0.2 | 0.00 | 1.0000 |
| SI | 96  | 0.2 | 0.00 | 1.0000 |
| SI | 128 | 0.2 | 0.00 | 1.0000 |
| SI | 32  | 0.2 | 0.01 | 0.9911 |
| SI | 48  | 0.2 | 0.01 | 0.9987 |
| SI | 64  | 0.2 | 0.01 | 0.9995 |
| SI | 80  | 0.2 | 0.01 | 0.9999 |
| SI | 96  | 0.2 | 0.01 | 1.0000 |
| SI | 128 | 0.2 | 0.01 | 1.0000 |
| SI | 32  | 0.2 | 0.02 | 0.9789 |
| SI | 48  | 0.2 | 0.02 | 0.9928 |
| SI | 64  | 0.2 | 0.02 | 0.9977 |
| SI | 80  | 0.2 | 0.02 | 0.9992 |
| SI | 96  | 0.2 | 0.02 | 0.9999 |
| SI | 128 | 0.2 | 0.02 | 1.0000 |
| SI | 32  | 0.2 | 0.05 | 0.9152 |
| SI | 48  | 0.2 | 0.05 | 0.9534 |
| SI | 64  | 0.2 | 0.05 | 0.9725 |
| SI | 80  | 0.2 | 0.05 | 0.9822 |
| SI | 96  | 0.2 | 0.05 | 0.9893 |
| SI | 128 | 0.2 | 0.05 | 0.9961 |
| SI | 32  | 0.2 | 0.10 | 0.7823 |
| SI | 48  | 0.2 | 0.10 | 0.8356 |
| SI | 64  | 0.2 | 0.10 | 0.8611 |
| SI | 80  | 0.2 | 0.10 | 0.8893 |
| SI | 96  | 0.2 | 0.10 | 0.9132 |
| SI | 128 | 0.2 | 0.10 | 0.9403 |
| SI | 32  | 0.2 | 0.25 | 0.5455 |
| SI | 48  | 0.2 | 0.25 | 0.5551 |
| SI | 64  | 0.2 | 0.25 | 0.5629 |
| SI | 80  | 0.2 | 0.25 | 0.5766 |
| SI | 96  | 0.2 | 0.25 | 0.5809 |
| SI | 128 | 0.2 | 0.25 | 0.5950 |
| SI | 32  | 0.3 | 0.00 | 1.0000 |
| SI | 48  | 0.3 | 0.00 | 1.0000 |
| SI | 64  | 0.3 | 0.00 | 1.0000 |
| SI | 80  | 0.3 | 0.00 | 1.0000 |
| SI | 96  | 0.3 | 0.00 | 1.0000 |
| SI | 128 | 0.3 | 0.00 | 1.0000 |
| SI | 32  | 0.3 | 0.01 | 0.9969 |
| SI | 48  | 0.3 | 0.01 | 0.9998 |
| SI | 64  | 0.3 | 0.01 | 1.0000 |
| SI | 80  | 0.3 | 0.01 | 1.0000 |
| SI | 96  | 0.3 | 0.01 | 1.0000 |
| SI | 128 | 0.3 | 0.01 | 1.0000 |
| SI | 32  | 0.3 | 0.02 | 0.9934 |
| SI | 48  | 0.3 | 0.02 | 0.9983 |
| SI | 64  | 0.3 | 0.02 | 0.9996 |
| SI | 80  | 0.3 | 0.02 | 1.0000 |
| SI | 96  | 0.3 | 0.02 | 1.0000 |
| SI | 128 | 0.3 | 0.02 | 1.0000 |

|    |     |     |      |        |
|----|-----|-----|------|--------|
| SI | 32  | 0.3 | 0.05 | 0.9650 |
| SI | 48  | 0.3 | 0.05 | 0.9862 |
| SI | 64  | 0.3 | 0.05 | 0.9942 |
| SI | 80  | 0.3 | 0.05 | 0.9976 |
| SI | 96  | 0.3 | 0.05 | 0.9992 |
| SI | 128 | 0.3 | 0.05 | 0.9999 |
| SI | 32  | 0.3 | 0.10 | 0.8895 |
| SI | 48  | 0.3 | 0.10 | 0.9316 |
| SI | 64  | 0.3 | 0.10 | 0.9525 |
| SI | 80  | 0.3 | 0.10 | 0.9688 |
| SI | 96  | 0.3 | 0.10 | 0.9826 |
| SI | 128 | 0.3 | 0.10 | 0.9906 |
| SI | 32  | 0.3 | 0.25 | 0.6506 |
| SI | 48  | 0.3 | 0.25 | 0.6864 |
| SI | 64  | 0.3 | 0.25 | 0.7200 |
| SI | 80  | 0.3 | 0.25 | 0.7377 |
| SI | 96  | 0.3 | 0.25 | 0.7609 |
| SI | 128 | 0.3 | 0.25 | 0.7954 |
| SI | 32  | 0.4 | 0.00 | 1.0000 |
| SI | 48  | 0.4 | 0.00 | 1.0000 |
| SI | 64  | 0.4 | 0.00 | 1.0000 |
| SI | 80  | 0.4 | 0.00 | 1.0000 |
| SI | 96  | 0.4 | 0.00 | 1.0000 |
| SI | 128 | 0.4 | 0.00 | 1.0000 |
| SI | 32  | 0.4 | 0.01 | 0.9996 |
| SI | 48  | 0.4 | 0.01 | 1.0000 |
| SI | 64  | 0.4 | 0.01 | 1.0000 |
| SI | 80  | 0.4 | 0.01 | 1.0000 |
| SI | 96  | 0.4 | 0.01 | 1.0000 |
| SI | 128 | 0.4 | 0.01 | 1.0000 |
| SI | 32  | 0.4 | 0.02 | 0.9981 |
| SI | 48  | 0.4 | 0.02 | 0.9996 |
| SI | 64  | 0.4 | 0.02 | 1.0000 |
| SI | 80  | 0.4 | 0.02 | 1.0000 |
| SI | 96  | 0.4 | 0.02 | 1.0000 |
| SI | 128 | 0.4 | 0.02 | 1.0000 |
| SI | 32  | 0.4 | 0.05 | 0.9831 |
| SI | 48  | 0.4 | 0.05 | 0.9946 |
| SI | 64  | 0.4 | 0.05 | 0.9986 |
| SI | 80  | 0.4 | 0.05 | 0.9995 |
| SI | 96  | 0.4 | 0.05 | 0.9998 |
| SI | 128 | 0.4 | 0.05 | 1.0000 |
| SI | 32  | 0.4 | 0.10 | 0.9317 |
| SI | 48  | 0.4 | 0.10 | 0.9622 |
| SI | 64  | 0.4 | 0.10 | 0.9795 |
| SI | 80  | 0.4 | 0.10 | 0.9883 |
| SI | 96  | 0.4 | 0.10 | 0.9927 |
| SI | 128 | 0.4 | 0.10 | 0.9980 |
| SI | 32  | 0.4 | 0.25 | 0.7181 |
| SI | 48  | 0.4 | 0.25 | 0.7701 |
| SI | 64  | 0.4 | 0.25 | 0.8015 |
| SI | 80  | 0.4 | 0.25 | 0.8247 |
| SI | 96  | 0.4 | 0.25 | 0.8471 |
| SI | 128 | 0.4 | 0.25 | 0.8835 |
| U  | 32  | 0.2 | 0.00 | 0.0000 |
| U  | 48  | 0.2 | 0.00 | 0.0000 |

|   |     |     |      |        |
|---|-----|-----|------|--------|
| U | 64  | 0.2 | 0.00 | 0.0000 |
| U | 80  | 0.2 | 0.00 | 0.0000 |
| U | 96  | 0.2 | 0.00 | 0.0000 |
| U | 128 | 0.2 | 0.00 | 0.0000 |
| U | 32  | 0.2 | 0.01 | 0.0000 |
| U | 48  | 0.2 | 0.01 | 0.0000 |
| U | 64  | 0.2 | 0.01 | 0.0000 |
| U | 80  | 0.2 | 0.01 | 0.0000 |
| U | 96  | 0.2 | 0.01 | 0.0000 |
| U | 128 | 0.2 | 0.01 | 0.0000 |
| U | 32  | 0.2 | 0.02 | 0.0000 |
| U | 48  | 0.2 | 0.02 | 0.0000 |
| U | 64  | 0.2 | 0.02 | 0.0000 |
| U | 80  | 0.2 | 0.02 | 0.0000 |
| U | 96  | 0.2 | 0.02 | 0.0000 |
| U | 128 | 0.2 | 0.02 | 0.0000 |
| U | 32  | 0.2 | 0.05 | 0.0001 |
| U | 48  | 0.2 | 0.05 | 0.0000 |
| U | 64  | 0.2 | 0.05 | 0.0000 |
| U | 80  | 0.2 | 0.05 | 0.0000 |
| U | 96  | 0.2 | 0.05 | 0.0000 |
| U | 128 | 0.2 | 0.05 | 0.0000 |
| U | 32  | 0.2 | 0.10 | 0.0001 |
| U | 48  | 0.2 | 0.10 | 0.0000 |
| U | 64  | 0.2 | 0.10 | 0.0000 |
| U | 80  | 0.2 | 0.10 | 0.0000 |
| U | 96  | 0.2 | 0.10 | 0.0000 |
| U | 128 | 0.2 | 0.10 | 0.0000 |
| U | 32  | 0.2 | 0.25 | 0.0139 |
| U | 48  | 0.2 | 0.25 | 0.0033 |
| U | 64  | 0.2 | 0.25 | 0.0007 |
| U | 80  | 0.2 | 0.25 | 0.0004 |
| U | 96  | 0.2 | 0.25 | 0.0001 |
| U | 128 | 0.2 | 0.25 | 0.0000 |
| U | 32  | 0.3 | 0.00 | 0.0000 |
| U | 48  | 0.3 | 0.00 | 0.0000 |
| U | 64  | 0.3 | 0.00 | 0.0000 |
| U | 80  | 0.3 | 0.00 | 0.0000 |
| U | 96  | 0.3 | 0.00 | 0.0000 |
| U | 128 | 0.3 | 0.00 | 0.0000 |
| U | 32  | 0.3 | 0.01 | 0.0000 |
| U | 48  | 0.3 | 0.01 | 0.0000 |
| U | 64  | 0.3 | 0.01 | 0.0000 |
| U | 80  | 0.3 | 0.01 | 0.0000 |
| U | 96  | 0.3 | 0.01 | 0.0000 |
| U | 128 | 0.3 | 0.01 | 0.0000 |
| U | 32  | 0.3 | 0.02 | 0.0000 |
| U | 48  | 0.3 | 0.02 | 0.0000 |
| U | 64  | 0.3 | 0.02 | 0.0000 |
| U | 80  | 0.3 | 0.02 | 0.0000 |
| U | 96  | 0.3 | 0.02 | 0.0000 |
| U | 128 | 0.3 | 0.02 | 0.0000 |
| U | 32  | 0.3 | 0.05 | 0.0000 |
| U | 48  | 0.3 | 0.05 | 0.0000 |
| U | 64  | 0.3 | 0.05 | 0.0000 |
| U | 80  | 0.3 | 0.05 | 0.0000 |

|   |     |     |      |        |
|---|-----|-----|------|--------|
| U | 96  | 0.3 | 0.05 | 0.0000 |
| U | 128 | 0.3 | 0.05 | 0.0000 |
| U | 32  | 0.3 | 0.10 | 0.0000 |
| U | 48  | 0.3 | 0.10 | 0.0000 |
| U | 64  | 0.3 | 0.10 | 0.0000 |
| U | 80  | 0.3 | 0.10 | 0.0000 |
| U | 96  | 0.3 | 0.10 | 0.0000 |
| U | 128 | 0.3 | 0.10 | 0.0000 |
| U | 32  | 0.3 | 0.25 | 0.0083 |
| U | 48  | 0.3 | 0.25 | 0.0021 |
| U | 64  | 0.3 | 0.25 | 0.0005 |
| U | 80  | 0.3 | 0.25 | 0.0001 |
| U | 96  | 0.3 | 0.25 | 0.0000 |
| U | 128 | 0.3 | 0.25 | 0.0000 |
| U | 32  | 0.4 | 0.00 | 0.0000 |
| U | 48  | 0.4 | 0.00 | 0.0000 |
| U | 64  | 0.4 | 0.00 | 0.0000 |
| U | 80  | 0.4 | 0.00 | 0.0000 |
| U | 96  | 0.4 | 0.00 | 0.0000 |
| U | 128 | 0.4 | 0.00 | 0.0000 |
| U | 32  | 0.4 | 0.01 | 0.0000 |
| U | 48  | 0.4 | 0.01 | 0.0000 |
| U | 64  | 0.4 | 0.01 | 0.0000 |
| U | 80  | 0.4 | 0.01 | 0.0000 |
| U | 96  | 0.4 | 0.01 | 0.0000 |
| U | 128 | 0.4 | 0.01 | 0.0000 |
| U | 32  | 0.4 | 0.02 | 0.0000 |
| U | 48  | 0.4 | 0.02 | 0.0000 |
| U | 64  | 0.4 | 0.02 | 0.0000 |
| U | 80  | 0.4 | 0.02 | 0.0000 |
| U | 96  | 0.4 | 0.02 | 0.0000 |
| U | 128 | 0.4 | 0.02 | 0.0000 |
| U | 32  | 0.4 | 0.05 | 0.0000 |
| U | 48  | 0.4 | 0.05 | 0.0000 |
| U | 64  | 0.4 | 0.05 | 0.0000 |
| U | 80  | 0.4 | 0.05 | 0.0000 |
| U | 96  | 0.4 | 0.05 | 0.0000 |
| U | 128 | 0.4 | 0.05 | 0.0000 |
| U | 32  | 0.4 | 0.10 | 0.0000 |
| U | 48  | 0.4 | 0.10 | 0.0000 |
| U | 64  | 0.4 | 0.10 | 0.0000 |
| U | 80  | 0.4 | 0.10 | 0.0000 |
| U | 96  | 0.4 | 0.10 | 0.0000 |
| U | 128 | 0.4 | 0.10 | 0.0000 |
| U | 32  | 0.4 | 0.25 | 0.0082 |
| U | 48  | 0.4 | 0.25 | 0.0013 |
| U | 64  | 0.4 | 0.25 | 0.0003 |
| U | 80  | 0.4 | 0.25 | 0.0001 |
| U | 96  | 0.4 | 0.25 | 0.0000 |
| U | 128 | 0.4 | 0.25 | 0.0000 |

<sup>a</sup>Match call rates are per comparison of a pair of samples generated from a given relationship state. Genotyping error rates are per locus-level. Acronyms: Full Siblings, Minor Allele Frequency, Same Individual, Single Nucleotide Polymorphism, Unrelated.



Table S5.2 MSAT base case simulation results<sup>a</sup>.

| Relationship state | Number of loci | Number of alleles per locus | Allele frequency | ADO error rate | FA error rate | Match call rate |
|--------------------|----------------|-----------------------------|------------------|----------------|---------------|-----------------|
| FS                 | 5              | 5                           | 0.20             | 0.00           | 0.00          | 0.012           |
| FS                 | 5              | 5                           | 0.20             | 0.01           | 0.01          | 0.040           |
| FS                 | 5              | 5                           | 0.20             | 0.05           | 0.02          | 0.058           |
| FS                 | 5              | 5                           | 0.20             | 0.20           | 0.05          | 0.092           |
| FS                 | 5              | 10                          | 0.10             | 0.00           | 0.00          | 0.002           |
| FS                 | 5              | 10                          | 0.10             | 0.01           | 0.01          | 0.028           |
| FS                 | 5              | 10                          | 0.10             | 0.05           | 0.02          | 0.040           |
| FS                 | 5              | 10                          | 0.10             | 0.20           | 0.05          | 0.104           |
| FS                 | 5              | 20                          | 0.05             | 0.00           | 0.00          | 0.000           |
| FS                 | 5              | 20                          | 0.05             | 0.01           | 0.01          | 0.030           |
| FS                 | 5              | 20                          | 0.05             | 0.05           | 0.02          | 0.022           |
| FS                 | 5              | 20                          | 0.05             | 0.20           | 0.05          | 0.086           |
| FS                 | 10             | 5                           | 0.00             | 0.00           | 0.00          | 0.000           |
| FS                 | 10             | 5                           | 0.20             | 0.01           | 0.01          | 0.004           |
| FS                 | 10             | 5                           | 0.20             | 0.05           | 0.02          | 0.007           |
| FS                 | 10             | 5                           | 0.20             | 0.20           | 0.05          | 0.035           |
| FS                 | 10             | 10                          | 0.10             | 0.00           | 0.00          | 0.000           |
| FS                 | 10             | 10                          | 0.10             | 0.01           | 0.01          | 0.000           |
| FS                 | 10             | 10                          | 0.10             | 0.05           | 0.02          | 0.004           |
| FS                 | 10             | 10                          | 0.10             | 0.20           | 0.05          | 0.025           |
| FS                 | 10             | 20                          | 0.05             | 0.00           | 0.00          | 0.000           |
| FS                 | 10             | 20                          | 0.05             | 0.01           | 0.01          | 0.001           |
| FS                 | 10             | 20                          | 0.05             | 0.05           | 0.02          | 0.006           |
| FS                 | 10             | 20                          | 0.05             | 0.20           | 0.05          | 0.034           |
| FS                 | 15             | 5                           | 0.20             | 0.00           | 0.00          | 0.000           |
| FS                 | 15             | 5                           | 0.20             | 0.01           | 0.01          | 0.004           |
| FS                 | 15             | 5                           | 0.20             | 0.05           | 0.02          | 0.004           |
| FS                 | 15             | 5                           | 0.20             | 0.20           | 0.05          | 0.026           |
| FS                 | 15             | 10                          | 0.10             | 0.00           | 0.00          | 0.000           |
| FS                 | 15             | 10                          | 0.10             | 0.01           | 0.01          | 0.000           |
| FS                 | 15             | 10                          | 0.10             | 0.05           | 0.02          | 0.002           |
| FS                 | 15             | 10                          | 0.10             | 0.20           | 0.05          | 0.008           |
| FS                 | 15             | 20                          | 0.05             | 0.00           | 0.00          | 0.000           |
| FS                 | 15             | 20                          | 0.05             | 0.01           | 0.01          | 0.000           |
| FS                 | 15             | 20                          | 0.05             | 0.05           | 0.02          | 0.000           |
| FS                 | 15             | 20                          | 0.05             | 0.20           | 0.05          | 0.018           |
| FS                 | 20             | 5                           | 0.20             | 0.00           | 0.00          | 0.000           |
| FS                 | 20             | 5                           | 0.20             | 0.01           | 0.01          | 0.000           |
| FS                 | 20             | 5                           | 0.20             | 0.05           | 0.02          | 0.001           |
| FS                 | 20             | 5                           | 0.20             | 0.20           | 0.05          | 0.011           |
| FS                 | 20             | 10                          | 0.10             | 0.00           | 0.00          | 0.000           |
| FS                 | 20             | 10                          | 0.10             | 0.01           | 0.01          | 0.000           |
| FS                 | 20             | 10                          | 0.10             | 0.05           | 0.02          | 0.000           |
| FS                 | 20             | 10                          | 0.10             | 0.20           | 0.05          | 0.004           |
| FS                 | 20             | 20                          | 0.05             | 0.00           | 0.00          | 0.000           |
| FS                 | 20             | 20                          | 0.05             | 0.01           | 0.01          | 0.000           |
| FS                 | 20             | 20                          | 0.05             | 0.05           | 0.02          | 0.000           |
| FS                 | 20             | 20                          | 0.05             | 0.20           | 0.05          | 0.000           |
| SI                 | 5              | 5                           | 0.00             | 0.00           | 0.01          | 1.000           |
| SI                 | 5              | 5                           | 0.01             | 0.01           | 0.01          | 0.996           |
| SI                 | 5              | 5                           | 0.05             | 0.02           | 0.01          | 0.950           |
| SI                 | 5              | 5                           | 0.20             | 0.05           | 0.01          | 0.874           |

|    |    |    |      |      |      |       |
|----|----|----|------|------|------|-------|
| SI | 5  | 10 | 0.00 | 0.00 | 0.01 | 1.000 |
| SI | 5  | 10 | 0.01 | 0.01 | 0.01 | 0.988 |
| SI | 5  | 10 | 0.05 | 0.02 | 0.01 | 0.984 |
| SI | 5  | 10 | 0.20 | 0.05 | 0.01 | 0.966 |
| SI | 5  | 20 | 0.00 | 0.00 | 0.01 | 1.000 |
| SI | 5  | 20 | 0.01 | 0.01 | 0.01 | 0.984 |
| SI | 5  | 20 | 0.05 | 0.02 | 0.01 | 0.976 |
| SI | 5  | 20 | 0.20 | 0.05 | 0.01 | 0.976 |
| SI | 10 | 5  | 0.20 | 0.00 | 0.00 | 1.000 |
| SI | 10 | 5  | 0.20 | 0.01 | 0.01 | 0.996 |
| SI | 10 | 5  | 0.20 | 0.05 | 0.02 | 0.988 |
| SI | 10 | 5  | 0.20 | 0.20 | 0.05 | 0.951 |
| SI | 10 | 10 | 0.10 | 0.00 | 0.00 | 1.000 |
| SI | 10 | 10 | 0.10 | 0.01 | 0.01 | 0.997 |
| SI | 10 | 10 | 0.10 | 0.05 | 0.02 | 0.993 |
| SI | 10 | 10 | 0.10 | 0.20 | 0.05 | 0.985 |
| SI | 10 | 20 | 0.05 | 0.00 | 0.00 | 1.000 |
| SI | 10 | 20 | 0.05 | 0.01 | 0.01 | 0.997 |
| SI | 10 | 20 | 0.05 | 0.05 | 0.02 | 0.998 |
| SI | 10 | 20 | 0.05 | 0.20 | 0.05 | 1.000 |
| SI | 15 | 5  | 0.20 | 0.00 | 0.00 | 1.000 |
| SI | 15 | 5  | 0.20 | 0.01 | 0.01 | 0.998 |
| SI | 15 | 5  | 0.20 | 0.05 | 0.02 | 0.997 |
| SI | 15 | 5  | 0.20 | 0.20 | 0.05 | 0.980 |
| SI | 15 | 10 | 0.10 | 0.00 | 0.00 | 1.000 |
| SI | 15 | 10 | 0.10 | 0.01 | 0.01 | 1.000 |
| SI | 15 | 10 | 0.10 | 0.05 | 0.02 | 0.998 |
| SI | 15 | 10 | 0.10 | 0.20 | 0.05 | 0.997 |
| SI | 15 | 20 | 0.05 | 0.00 | 0.00 | 1.000 |
| SI | 15 | 20 | 0.05 | 0.01 | 0.01 | 1.000 |
| SI | 15 | 20 | 0.05 | 0.05 | 0.02 | 1.000 |
| SI | 15 | 20 | 0.05 | 0.20 | 0.05 | 1.000 |
| SI | 20 | 5  | 0.20 | 0.00 | 0.00 | 1.000 |
| SI | 20 | 5  | 0.20 | 0.01 | 0.01 | 1.000 |
| SI | 20 | 5  | 0.20 | 0.05 | 0.02 | 0.999 |
| SI | 20 | 5  | 0.20 | 0.20 | 0.05 | 0.996 |
| SI | 20 | 10 | 0.10 | 0.00 | 0.00 | 1.000 |
| SI | 20 | 10 | 0.10 | 0.01 | 0.01 | 1.000 |
| SI | 20 | 10 | 0.10 | 0.05 | 0.02 | 1.000 |
| SI | 20 | 10 | 0.10 | 0.20 | 0.05 | 0.998 |
| SI | 20 | 20 | 0.05 | 0.00 | 0.00 | 1.000 |
| SI | 20 | 20 | 0.05 | 0.01 | 0.01 | 1.000 |
| SI | 20 | 20 | 0.05 | 0.05 | 0.02 | 1.000 |
| SI | 20 | 20 | 0.05 | 0.20 | 0.05 | 1.000 |
| U  | 5  | 5  | 0.20 | 0.00 | 0.00 | 0.000 |
| U  | 5  | 5  | 0.20 | 0.01 | 0.01 | 0.000 |
| U  | 5  | 5  | 0.20 | 0.05 | 0.02 | 0.000 |
| U  | 5  | 5  | 0.20 | 0.20 | 0.05 | 0.000 |
| U  | 5  | 10 | 0.10 | 0.00 | 0.00 | 0.000 |
| U  | 5  | 10 | 0.10 | 0.01 | 0.01 | 0.000 |
| U  | 5  | 10 | 0.10 | 0.05 | 0.02 | 0.000 |
| U  | 5  | 10 | 0.10 | 0.20 | 0.05 | 0.000 |
| U  | 5  | 20 | 0.05 | 0.00 | 0.00 | 0.000 |
| U  | 5  | 20 | 0.05 | 0.01 | 0.01 | 0.000 |
| U  | 5  | 20 | 0.05 | 0.05 | 0.02 | 0.000 |
| U  | 5  | 20 | 0.05 | 0.20 | 0.05 | 0.000 |

|   |    |    |      |      |      |       |
|---|----|----|------|------|------|-------|
| U | 10 | 5  | 0.20 | 0.00 | 0.00 | 0.000 |
| U | 10 | 5  | 0.20 | 0.01 | 0.01 | 0.000 |
| U | 10 | 5  | 0.20 | 0.05 | 0.02 | 0.000 |
| U | 10 | 5  | 0.20 | 0.20 | 0.05 | 0.000 |
| U | 10 | 10 | 0.10 | 0.00 | 0.00 | 0.000 |
| U | 10 | 10 | 0.10 | 0.01 | 0.01 | 0.000 |
| U | 10 | 10 | 0.10 | 0.05 | 0.02 | 0.000 |
| U | 10 | 10 | 0.10 | 0.20 | 0.05 | 0.000 |
| U | 10 | 20 | 0.05 | 0.00 | 0.00 | 0.000 |
| U | 10 | 20 | 0.05 | 0.01 | 0.01 | 0.000 |
| U | 10 | 20 | 0.05 | 0.05 | 0.02 | 0.000 |
| U | 10 | 20 | 0.05 | 0.20 | 0.05 | 0.000 |
| U | 15 | 5  | 0.20 | 0.00 | 0.00 | 0.000 |
| U | 15 | 5  | 0.20 | 0.01 | 0.01 | 0.000 |
| U | 15 | 5  | 0.20 | 0.05 | 0.02 | 0.000 |
| U | 15 | 5  | 0.20 | 0.20 | 0.05 | 0.000 |
| U | 15 | 10 | 0.10 | 0.00 | 0.00 | 0.000 |
| U | 15 | 10 | 0.10 | 0.01 | 0.01 | 0.000 |
| U | 15 | 10 | 0.10 | 0.05 | 0.02 | 0.000 |
| U | 15 | 10 | 0.10 | 0.20 | 0.05 | 0.000 |
| U | 15 | 20 | 0.05 | 0.00 | 0.00 | 0.000 |
| U | 15 | 20 | 0.05 | 0.01 | 0.01 | 0.000 |
| U | 15 | 20 | 0.05 | 0.05 | 0.02 | 0.000 |
| U | 15 | 20 | 0.05 | 0.20 | 0.05 | 0.000 |
| U | 20 | 5  | 0.20 | 0.00 | 0.00 | 0.000 |
| U | 20 | 5  | 0.20 | 0.01 | 0.01 | 0.000 |
| U | 20 | 5  | 0.20 | 0.05 | 0.02 | 0.000 |
| U | 20 | 5  | 0.20 | 0.20 | 0.05 | 0.000 |
| U | 20 | 10 | 0.10 | 0.00 | 0.00 | 0.000 |
| U | 20 | 10 | 0.10 | 0.01 | 0.01 | 0.000 |
| U | 20 | 10 | 0.10 | 0.05 | 0.02 | 0.000 |
| U | 20 | 10 | 0.10 | 0.20 | 0.05 | 0.000 |
| U | 20 | 20 | 0.05 | 0.00 | 0.00 | 0.000 |
| U | 20 | 20 | 0.05 | 0.01 | 0.01 | 0.000 |
| U | 20 | 20 | 0.05 | 0.05 | 0.02 | 0.000 |
| U | 20 | 20 | 0.05 | 0.20 | 0.05 | 0.000 |

<sup>a</sup> Match call rates are per comparison of a pair of samples generated from a given relationship state. Genotyping error rates are per locus-level. Acronyms: Allelic Drop Out, False Allele, Full Siblings, MicroSATellite, Same Individual, Unrelated.
